# Supplementary material for: A domain-based vaccine construct against SARS-CoV-2, the causative agent of COVID-19 pandemic: development of self-amplifying mRNA and peptide vaccines
Source: PubMed Central journal article supplement — Bioimpacts. 2020 Dec 10;11(1):65–84. doi: 10.34172/bi.2021.11 (PMC7803919; doi:10.34172/bi.2021.11), 2020-12-10
Supplement: bi-11-65-s001.pdf [file bi-11-65-s001.pdf]

## Supplementary file 1

Pourseif et al., *BiolImpacts*, 2021, 11(1), 65-84  
doi: 10.34172/bi.2021.11  
<http://bi.tbzmed.ac.ir/>

# **A domain-based vaccine construct against SARS-CoV-2, the causative agent of COVID-19 pandemic: development of self-amplifying mRNA and peptide vaccines**

Mohammad Mostafa Pourseif<sup>1</sup>, Sepideh Parvizpour<sup>1</sup>, Behzad Jafari<sup>2,1</sup>, Jaber Dehghani<sup>1</sup>, Behrouz Naghili<sup>3</sup>,  
Yadollah Omid<sup>4\*</sup>

<sup>1</sup> Research Center for Pharmaceutical Nanotechnology, Biomedicine Institute, Tabriz University of Medical Sciences, Tabriz, Iran

<sup>2</sup> Department of Medicinal Chemistry, Faculty of Pharmacy, Urmia University of Medical Sciences, Urmia, Iran

<sup>3</sup> Research Center for Infectious and Tropical Diseases, Tabriz University of Medical Sciences, Tabriz, Iran

<sup>4</sup> Nova Southeastern University, College of Pharmacy, Florida, USA

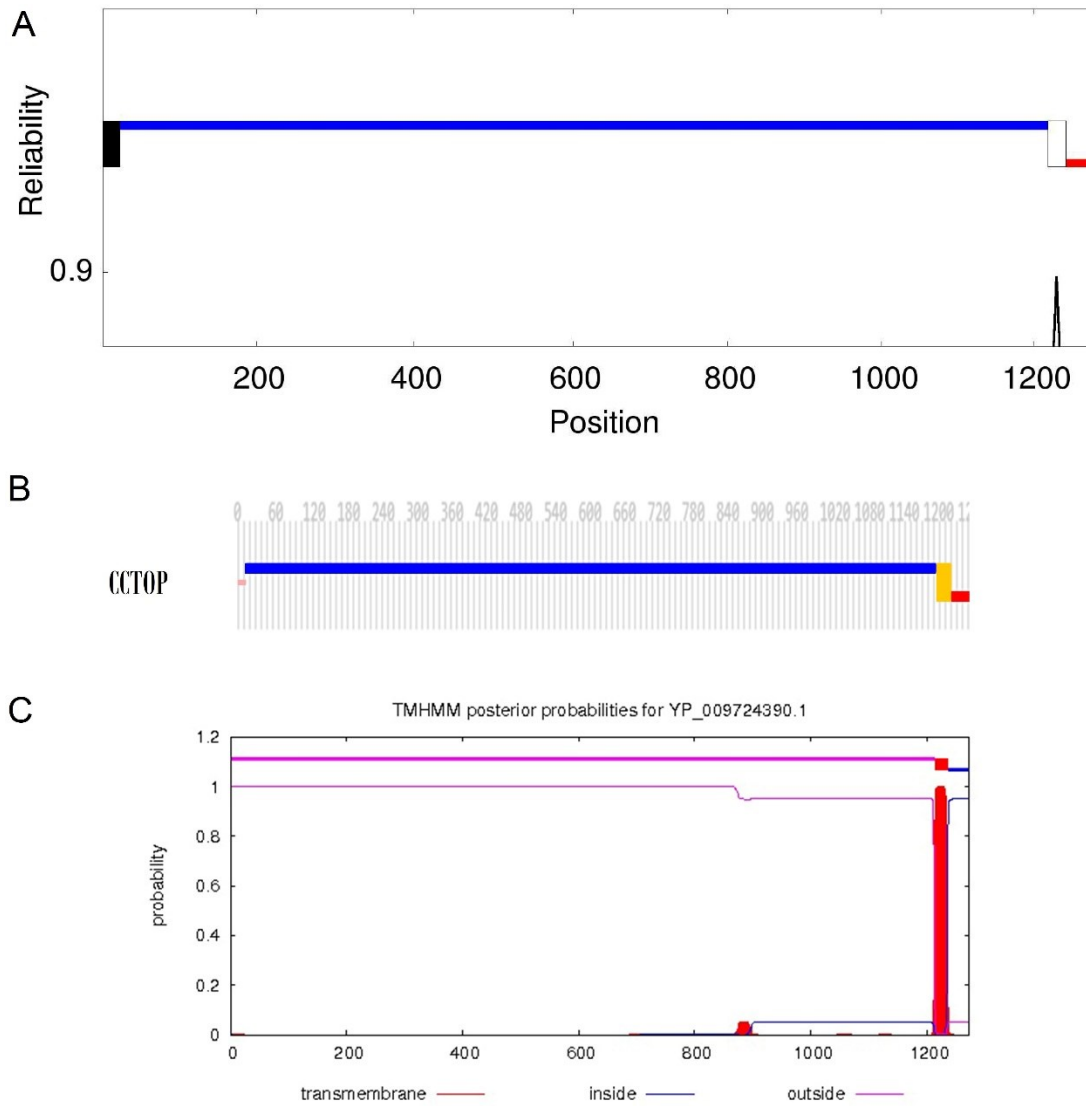

**Figure S1.** Plots show the potential transmembrane topology and signal peptide in the SARS-CoV-2 spike glycoprotein sequence. **A)** The consensus prediction plot of the potential transmembrane and intracellular regions of the glycoprotein S which is predicted using the TOPCONS server. **B)** the CCTOP plot shows transmembrane topology of the Glycoprotein S. **C)** The residue-based topology prediction plot obtained from TMHMM online server.

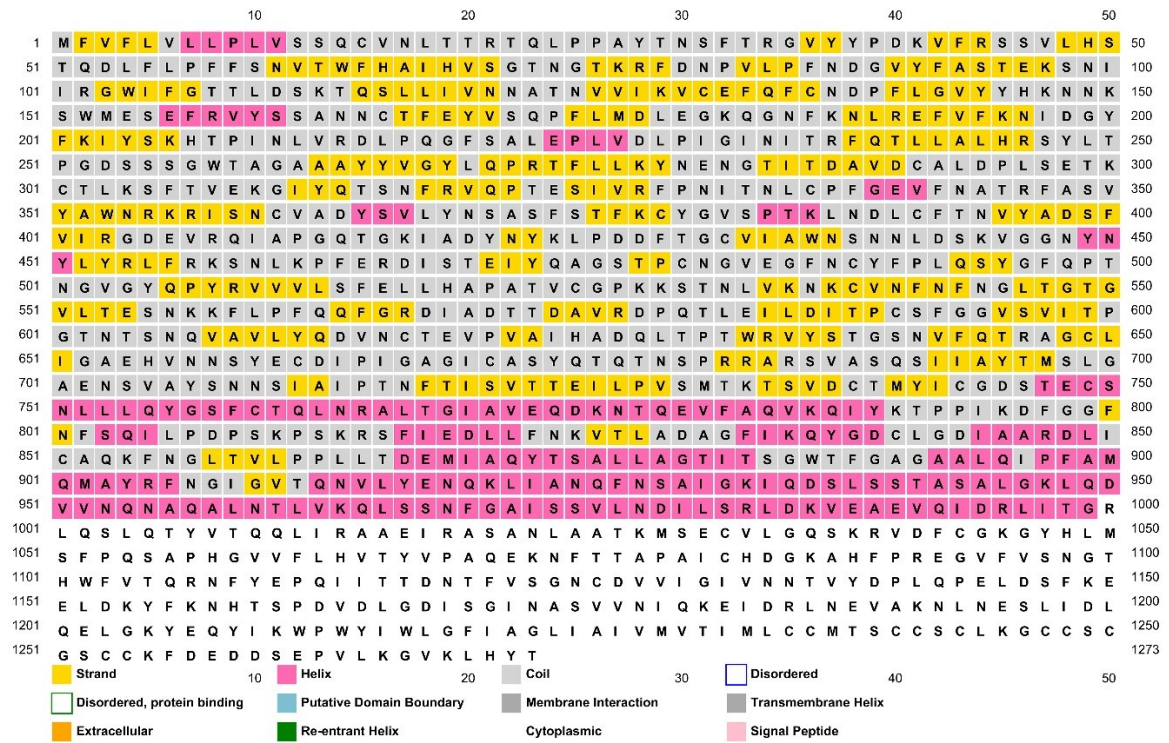

Figure S2. The secondary structure of the reference sequence of SARS-CoV-2 spike glycoprotein.

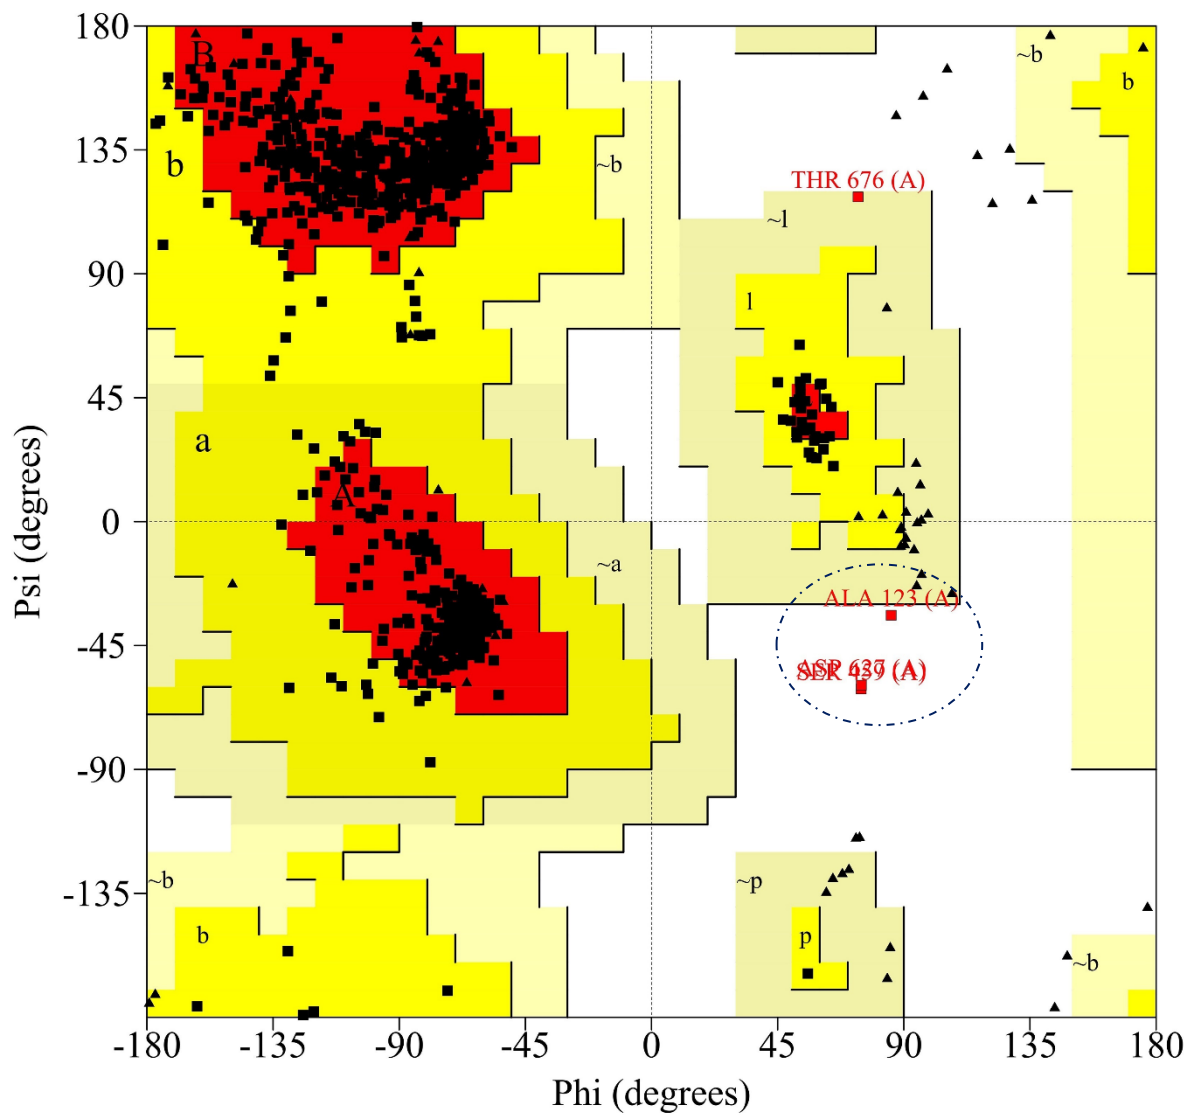

**Figure S3.** The 3D structure validation of the homology modeled SARS-CoV-2 protein S. Ramachandran plot of the modeled 3D structure. The plot indicates that only three residues (Asp627, Ser459, and Ala123) are located in the disallowed region (marked by a dash dotted circle), while 92.1% of the residues are in the most favorable region, and the rest of them (7.6%) are located in the additionally and generously allowed regions of the map.

|                |                                                                |      |
|----------------|----------------------------------------------------------------|------|
| YP_009724390.1 | MFVFLVLLPLVSSQCVNLT--RTQLPPAY--TNSFTRGVYYPDKVFRSSVLHSTQDLFL    | 56   |
| NP_828851.1    | MFIFLLFLTLTSGSLDRCTTFDDVQAPNYTQHTSSMRGVYYPDEIFRSDTLVLTQDLFL    | 60   |
| YP_009724390.1 | PFFSNVTWFHAIHVSNGTNGTKRFDNPVLPFNDGVYFASTEKSNIRGWIFGTTLDLSDKTQS | 116  |
| NP_828851.1    | PFFSNVTWGFHTIN-----HTFGNPVVPKDGIFYAATEKSNVVRGWVFGSTMNKNSQS     | 113  |
| YP_009724390.1 | LLIVNATNVVIVKVFQFCNDPFLGVYHKNNKSNWSEFRVYSSANNCTFEYVSPQFL       | 176  |
| NP_828851.1    | VIIINNSTNVVIRACNFELCDNPFFAVSKPMGT---QTHMIFDNANFCTFEYISDAFS     | 169  |
| YP_009724390.1 | MDLEGKQGNFKNLRFEVFKNDGYFKIYSKHTPINLVRDLPQGFSALEPLVDLPIGINIT    | 236  |
| NP_828851.1    | LDVSEKSGNFKHLREFVFKNDGFLVYKGYQPIDVVRDLPQGFNTLKPFIKPLGINIT      | 229  |
| YP_009724390.1 | RFQTLALHRSYLTGDSSSGWTAGAAYVYGYLQPTFLLLKYNENGTITDAVDCALDPL      | 296  |
| NP_828851.1    | NFRAILTAFS-----PAQDIWGTSAAYVYGYLQPTFLMLKYDENGITDAVDCSQNPL      | 283  |
| YP_009724390.1 | SETKCTLKSFTVEKGIYQTSNFRVQPTESIVRFPNITNLCPFGEVFNATRFASVYAWNRK   | 356  |
| NP_828851.1    | AELKCSVKSFEIDKGIYQTSNFRVQPTESIVRFPNITNLCPFGEVFNATRFASVYAWNRK   | 343  |
| YP_009724390.1 | RISNCVADYSVLVNSASFSTFKCYGVSPTKLNDLCFTNVYADSFVIRGDEVQIAPGQTG    | 416  |
| NP_828851.1    | KISNCVADYSVLVNSATFFSTFKCYGVSATKLNDLCFSNVYADSFVVKGDVVRQIAPGQTG  | 403  |
| YP_009724390.1 | KIADYNYKLPDDFTGCVIAWNSNLDKVGNGYNYLRYLFRKSNLKPFFERDISTEIQYQD    | 476  |
| NP_828851.1    | VIADYNYKLPDDFMGCVLAWNTRNIDATSTGNVYKRYLRHLKRPFERDISNVPFSPD      | 463  |
| YP_009724390.1 | STPCNGVEGFNCYFPLQSYGFQPTNGVGYQPYRVVLSFELLHAPATVCGPKKSTNLVKN    | 536  |
| NP_828851.1    | GKPCPTPALNCYVPLNDYGFYTTTIGVQPYRVVLSFELLNAPATVCGPKLSTDLTKN      | 522  |
| YP_009724390.1 | KCVNFNFGTLGTGVLTESNKKFLPFQFGRDIADTDAVRDPQTLIILDITPCSFGGVS      | 596  |
| NP_828851.1    | QCVNFNFGTLGTGVLTPSKRFQFQFGRDVSDFITDSVRDPKTEIILDISPCAFGGVS      | 582  |
| YP_009724390.1 | VITPGTNSNQAVLYQDVNCTEVPVAIHADQLTPTRVYVSTGNSVVFQTRAGCLIGAEHV    | 656  |
| NP_828851.1    | VITPGTNASSEAVLYQDVNCTDVSTAIHADQLTPAWRYSTGNNVFTQAGCLIGAEHV      | 642  |
| YP_009724390.1 | NNSYECDIPIGAGICASYQTQNSPRRARSVASQSIAYTMSLGAENSVAYSNNSIAIPT     | 716  |
| NP_828851.1    | DTSYECDIPIGAGICASYHTVSL----LRSTSQKSIAYTMSLGAENSVAYSNNTIAIPT    | 698  |
| YP_009724390.1 | NFTISVTEILPVSMTKTSVDCMYICGDSSTECNLLQYGSFCTQLNRALTGIAVEQDK      | 776  |
| NP_828851.1    | NFSISITTEVMPVSMKTSVDCNMYICGDSSTECANLLQYGSFCTQLNRALSGIAAEQDR    | 758  |
| YP_009724390.1 | NTQEVFAQVKQIYKTPPIKDFGGFNFSQILPDPSPKPSKRSFIEDLLFNKVTLADAGFIKQ  | 836  |
| NP_828851.1    | NTRVEFAQVKQMYKTPTLKYGGFNFSQILPDPPLKPTKRSFIEDLLFNKVTLADAGFMKQ   | 818  |
| YP_009724390.1 | YGDCLGDIARDLCAQKFNGLTVLPLLDDEIAQYTSALLAGTITSGWTFGAGAALQI       | 896  |
| NP_828851.1    | YGECLGDIARDLCAQKFNGLTVLPLLDDEIAAYTAALVSGTATAGWTFGAGAALQI       | 878  |
| YP_009724390.1 | PFAMQAYRFRNGIGVTONVLYENQKLIANQFNSAIGKIQDSLSTASALGKLQDVVNQNA    | 956  |
| NP_828851.1    | PFAMQAYRFRNGIGVTONVLYENQKLIANQFNKAIKSIQESLTTSTALGKLQDVVNQNA    | 938  |
| YP_009724390.1 | QALNTLVKQLSSNFGAISSVLDLILSRDKVEAEVQIDRLITGRQLQSLQTYVTQQLIRAA   | 1016 |
| NP_828851.1    | QALNTLVKQLSSNFGAISSVLDLILSRDKVEAEVQIDRLITGRQLQSLQTYVTQQLIRAA   | 998  |
| YP_009724390.1 | EIRASANLAATKMSECVLQSKRVDFCGKGYHLSMFPQSAHPGVVFLHVTYVPAQEKNF     | 1076 |
| NP_828851.1    | EIRASANLAATKMSECVLQSKRVDFCGKGYHLSMFPQSAHPGVVFLHVTYVPSQERNFT    | 1058 |
| YP_009724390.1 | TAPAICHGDKAHPREGVFNSTGHWFTVQRFYEQIITDNTFVSGNCDVIGIVNNT         | 1136 |
| NP_828851.1    | TAPAICHEGKAYFPREGVFNSTGHWFTVQRFYEQIITDNTFVSGNCDVIGIINNT        | 1118 |
| YP_009724390.1 | VYDPLQPELDSFKEELDKYFNHTSPDVLGDISGINASVWNIQKEIDRLNEVAKNLNES     | 1196 |
| NP_828851.1    | VYDPLQPELDSFKEELDKYFNHTSPDVLGDISGINASVWNIQKEIDRLNEVAKNLNES     | 1178 |
| YP_009724390.1 | LIDLQELGKYEYIKWPYIWLGFIAGLIAIVMVTIMLCCMTSCCSCCKGACSCGSCCKF     | 1256 |
| NP_828851.1    | LIDLQELGKYEYIKWPYVWLGFIAGLIAIVMVTILLCCMTSCCSCCKGACSCGSCCKF     | 1238 |
| YP_009724390.1 | DEDDSEPVKGVKLVHT 1273                                          |      |
| NP_828851.1    | DEDDSEPVKGVKLVHT 1255                                          |      |

**Figure S4.** Pairwise sequence alignment of the reference sequences of the spike proteins of SARS-CoV (accession ID: NP\_828851.1) and SARS-CoV-2 (accession ID: YP\_009724390.1). The sequence alignment performed using Clustal Omega server (<https://www.ebi.ac.uk/Tools/msa/clustalo/>). Total 28 predicted B-cell epitopes are shown by red lines, and the final dominant epitopes are indicated as blue lines. The residues marked by green line are the membrane peptides of SARS-CoV spike protein recognized in SARS convalescent sera by antibodies to IgG, IgM, and IgA. Identical residues are shown by \*.

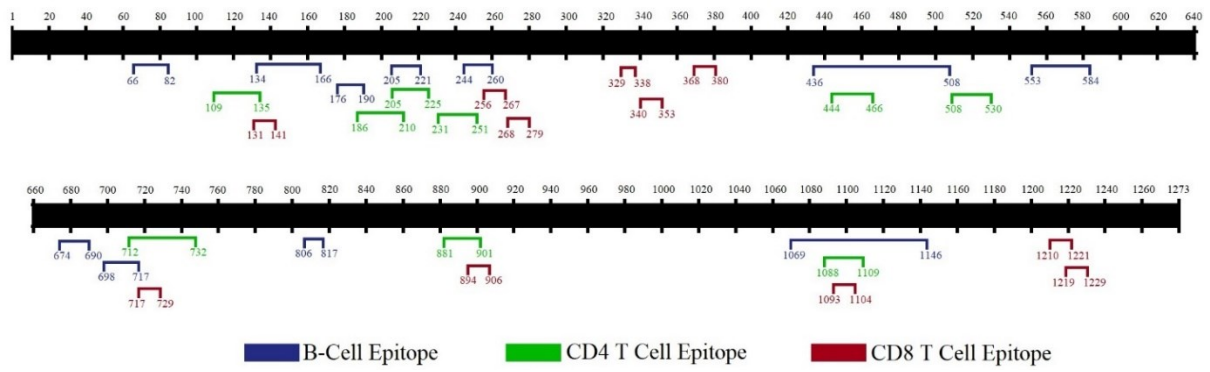

**Figure S5.** The scaled map shows the position of final chosen immunodominant B- and T-cell epitopes in the spike glycoprotein sequence. We selected three residue fragments as important domains for vaccine design, including I<sub>100</sub>–N<sub>280</sub>, T<sub>430</sub>–C<sub>590</sub>, and V<sub>1060</sub>–E<sub>1150</sub>.

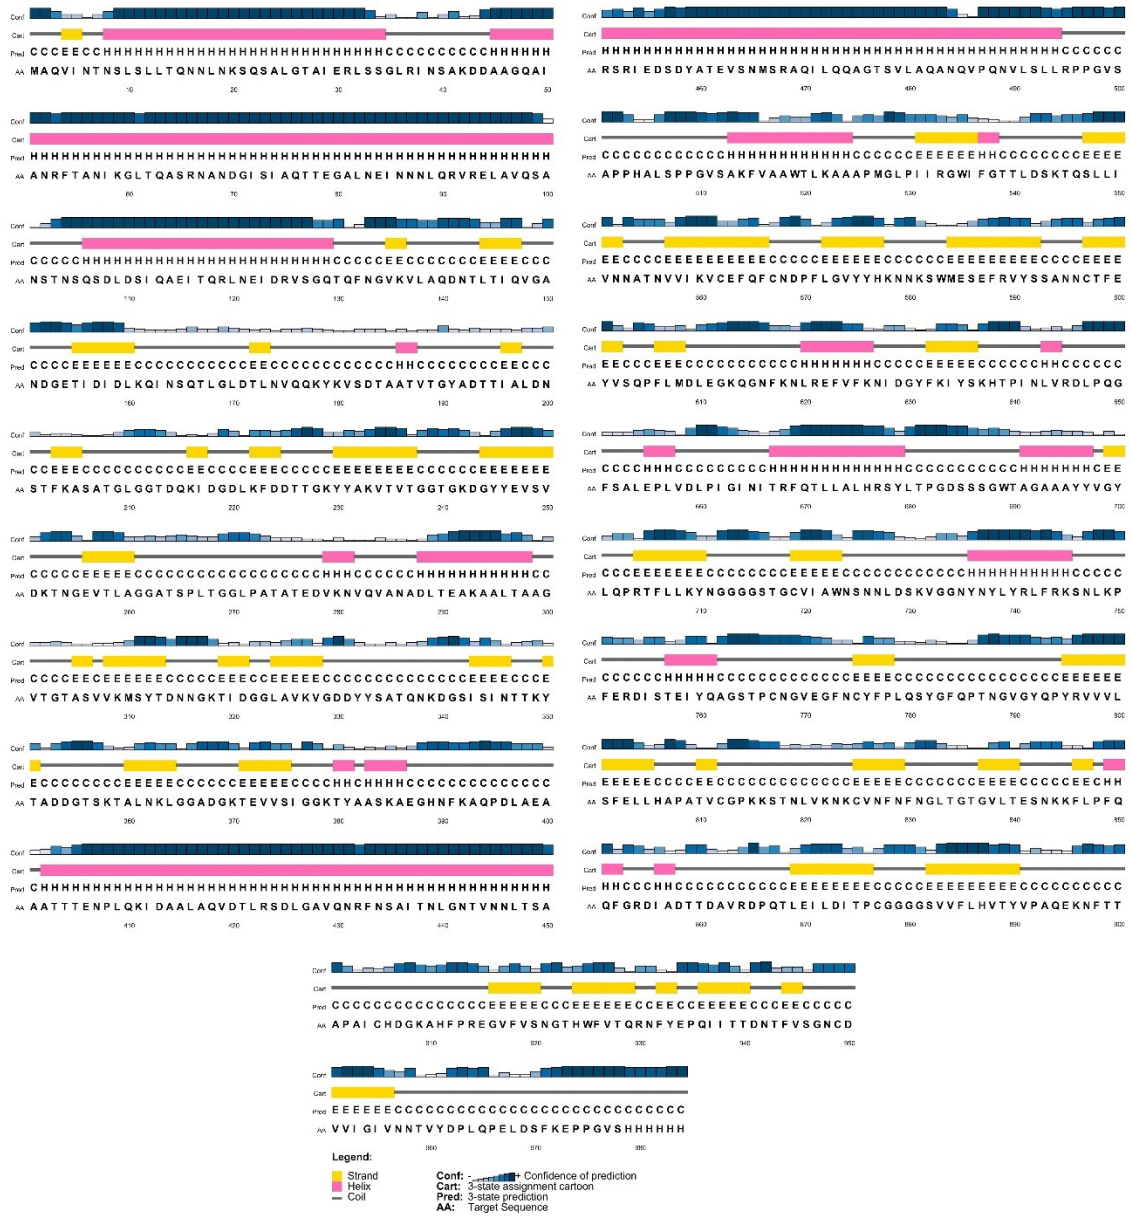

**Figure S6.** The secondary structure of the designed multi-domain vaccine construct, predicted by PSIPRED web server.

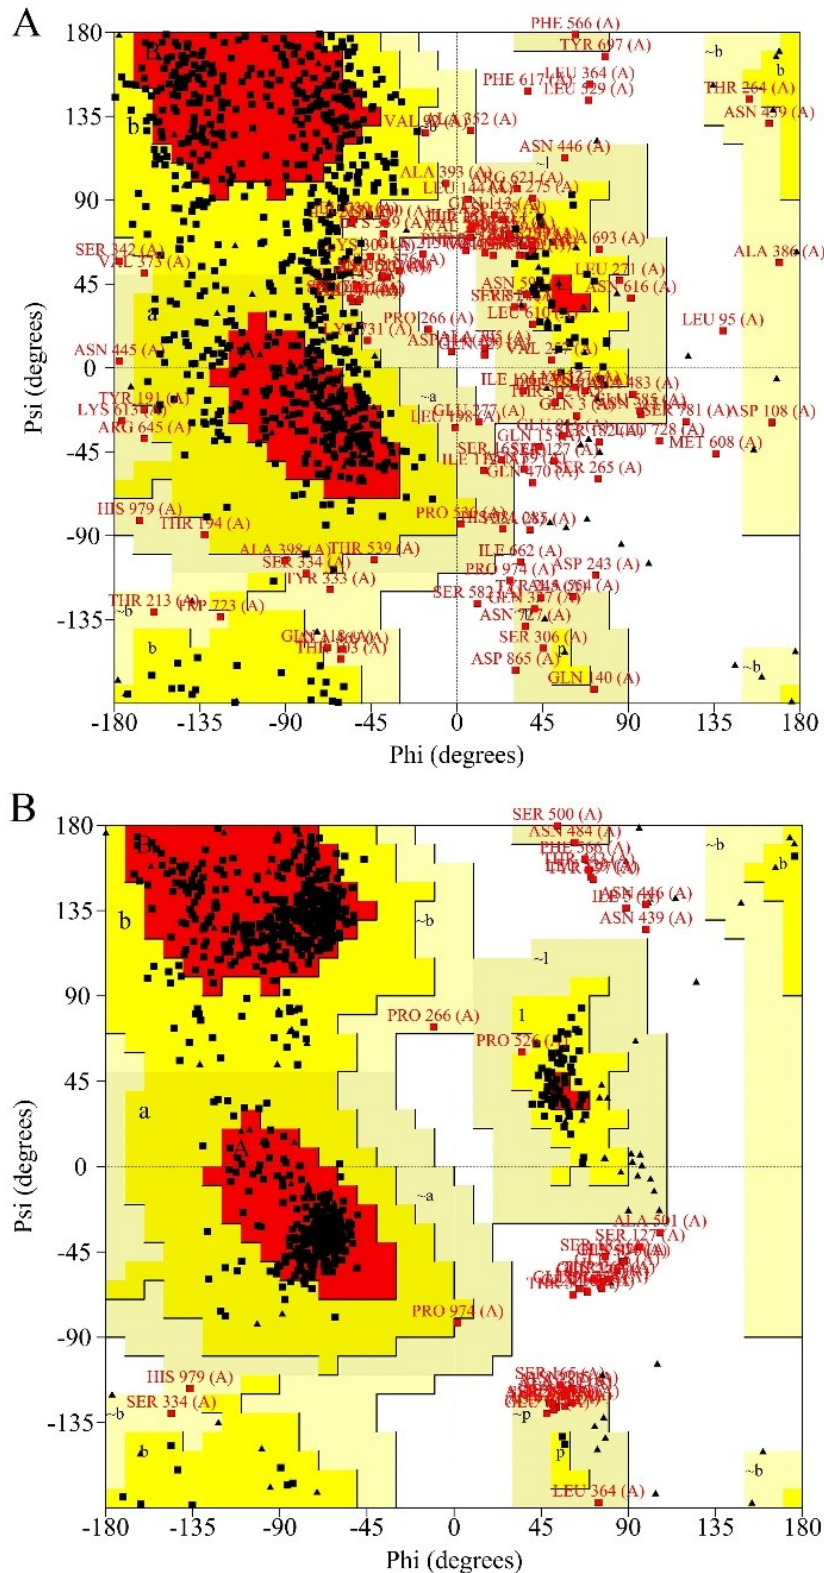

**Figure S7.** Modeling validation of the 3D structure of the multi-domain vaccine construct. **A)** The Ramachandran plot of the initially modeled vaccine. The Ramachandran plot indicates 26 residues (3.0%) are located in the disallowed region, while 399 of the residues (46.6%) are in the most favorable region, and the rest of them (50.4%) are located in the additionally and generously allowed regions. **B)** The Ramachandran plot of the energy minimized vaccine model. The Ramachandran plot shows 23 residues (2.7%) are placed in the disallowed region, while 710 residues (82.8%) are in the most favorable region, and the rest of them (14.5%) are located in the additionally and generously allowed regions.



**Table S1.** The VBA code to automate "Addspace" function in Excel.

---

```

Function AddSpace(Str As String) As String
    Dim i As Long
    For i = 1 To Len(Str)
        AddSpace = AddSpace & Mid(Str, i, 1) & " "
    Next i
    AddSpace = Trim(AddSpace)
End Function

```

---

**Table S2.** List of all experimentally (B-cell assay) determined human's Spike glycoprotein SARS-CoV-derived B-cell epitopes obtained from ViPR web-server (Reference sequence accession no. NP\_828851).

| IEDB ID | Epitope Sequence                    | Result | Method       | Measurement         |
|---------|-------------------------------------|--------|--------------|---------------------|
| 307     | AALVSGTATAGWTFGAG                   | P      | ELISA        | qualitative binding |
| 462     | AATKMSECVLGGSKRVD                   | P      | ELISA        | qualitative binding |
| 525     | AAVFVGYLKPPTTFMLKY                  | P      | ELISA        | qualitative binding |
| 1460    | AGCLIGAEHVDTSYECD                   | P      | ELISA        | qualitative binding |
| 2053    | AIPTNFSISITTEVMVPV                  | P      | ELISA        | qualitative binding |
| 2092    | AISSVLNDILSRDKVE                    | P      | ELISA        | qualitative binding |
| 3983    | AQKFNGLTVLPPLTDD                    | P      | ELISA        | qualitative binding |
| 4129    | ARDLICAQKFNGLTVLP                   | N      | ELISA        | qualitative binding |
| 5773    | AYFPREGVVFVNGTSWF                   | P      | ELISA        | qualitative binding |
| 5927    | AYSNNTIAIPTNFSISI                   | P      | ELISA        | qualitative binding |
| 6040    | CASYHTVSLLRSTSQKS                   | P      | ELISA        | qualitative binding |
| 6110    | CDIPIGAGICASYHTVS                   | P      | ELISA        | qualitative binding |
| 6332    | CGPKLSTDLIKNCVNF                    | P      | ELISA        | qualitative binding |
| 6333    | CGPKLSTDLIKNCVNFNENGL               | P      | ELISA        | qualitative binding |
| 6334    | TGTGVLTPSSKRFQPFQFG                 | P      | ELISA        | qualitative binding |
| 6334    | CGPKLSTDLIKNCVNFNENGL               | P      | western blot | qualitative binding |
| 6334    | TGTGVLTPSSKRFQPFQFGRDVSDFTD         | P      | western blot | qualitative binding |
| 6562    | CLGDINARDLICAQKFN                   | N      | ELISA        | qualitative binding |
| 7064    | CSQNPLAELKCSVKSFE                   | P      | ELISA        | qualitative binding |
| 7066    | CSQNPLAELKCSVKSFEIDKGIYQTSNFRVVPDGD | P      | ELISA        | qualitative binding |
| 7128    | CTDVSTAIHADQLTPAW                   | P      | ELISA        | qualitative binding |
| 7129    | CTDVSTAIHADQLTPAWRIYSTGNNVFQTQAG    | P      | ELISA        | qualitative binding |
| 7193    | CTPPALNCYWPLNDYGF                   | P      | ELISA        | qualitative binding |
| 7217    | CTTFDDVQAPNYTQHTSSMRGVVYPDEIFR      | P      | ELISA        | qualitative binding |
| 7280    | CVLAWNTRNIDATSTGN                   | P      | ELISA        | qualitative binding |
| 7383    | CYGVSAATKLNLCFSNV                   | P      | ELISA        | qualitative binding |
| 7452    | CYWPLNDYGFYTTTIGIG                  | P      | ELISA        | qualitative binding |
| 7868    | DDSEPVLLKGVKLLHYT                   | P      | ELISA        | qualitative binding |
| 8239    | DFCGKGYHLMSPQAAP                    | P      | ELISA        | qualitative binding |
| 8413    | DGIYFAATEKSNVVRGW                   | P      | ELISA        | qualitative binding |
| 9094    | DLGDISGINASVVNIQK                   | P      | ELISA        | qualitative binding |
| 9242    | DLPSGFNTLKPFIKPL                    | P      | ELISA        | qualitative binding |
| 9365    | DMIAAYTAALVSGTATA                   | P      | ELISA        | qualitative binding |
| 9956    | DRCTTFDDVQAPNYTQH                   | P      | ELISA        | qualitative binding |
| 10721   | DVSEKSGNFKHLREFVF                   | P      | ELISA        | qualitative binding |
| 10778   | DVVNQNAQALNTLVKQL                   | P      | ELISA        | qualitative binding |
| 11038   | EAEVQIDRLITGRLQSL                   | P      | ELISA        | qualitative binding |
| 11740   | EELDKYFKNHTSPDVL                    | N      | ELISA        | qualitative binding |
| 12417   | EIDKGIYQTSNFRVVP                    | P      | ELISA        | qualitative binding |
| 14208   | ESLTTTSTALGKLQDVV                   | P      | ELISA        | qualitative binding |
| 14626   | EVAKNLNESLIDLQELG                   | P      | ELISA        | qualitative binding |
| 15783   | FFAVSKPMGTQHTMIF                    | P      | ELISA        | qualitative binding |
| 15903   | FFSTFKYGVSAATKLN                    | P      | ELISA        | qualitative binding |
| 16183   | FIEDLLFNKVTLADAGF                   | P      | ELISA        | qualitative binding |
| 16376   | FKHLREFVFKNKDGFY                    | P      | ELISA        | qualitative binding |
| 16417   | FKNKDGFLYVYKGYQPI                   | P      | ELISA        | qualitative binding |
| 17132   | FNATKFPSVYAWEKKI                    | N      | ELISA        | qualitative binding |
| 17644   | FRSDTLYLTQDLFLPFY                   | P      | ELISA        | qualitative binding |
| 17929   | FTDSVRDPKTSEILDIS                   | P      | ELISA        | qualitative binding |

|       |                                |   |                                                             |                                                               |
|-------|--------------------------------|---|-------------------------------------------------------------|---------------------------------------------------------------|
| 18161 | FVFNGTSWFITQRNFFS              | P | ELISA                                                       | qualitative binding                                           |
| 18515 | GAALQIPFAMQMAYRFN              | P | ELISA                                                       | qualitative binding                                           |
| 19585 | GFMKQYGECLGDINARD              | P | ELISA                                                       | qualitative binding                                           |
| 19657 | GFYTTTGIGYQPYRVVV              | P | ELISA                                                       | qualitative binding                                           |
| 20288 | GIGVTQNVLYENQKQIA              | P | ELISA                                                       | qualitative binding                                           |
| 23051 | GVLTPSSKRFQPFQQFG              | P | ELISA                                                       | qualitative binding                                           |
| 23053 | GVLTPSSKRFQPFQFGRDVSDFDTSVRDPK | P | ELISA                                                       | qualitative binding                                           |
| 23296 | GWVFGSTMNNKSQSVII              | P | ELISA                                                       | qualitative binding                                           |
| 23437 | GYQPYRVVVLSFELLNA              | P | ELISA                                                       | qualitative binding                                           |
| 23520 | HADQLTPAWRIYSTGNN              | P | ELISA                                                       | qualitative binding                                           |
| 24923 | HTINHTFGNPNVIFKDG              | P | ELISA                                                       | qualitative binding                                           |
| 24978 | HTSSMRGVVYYPDEIFRS             | P | ELISA                                                       | qualitative binding                                           |
| 25031 | HVDTSYECDIPIGAGIC              | P | ELISA                                                       | qualitative binding                                           |
| 25219 | IAAEQDRNTREVFAQVK              | P | ELISA                                                       | qualitative binding                                           |
| 25250 | IADYNYKLPDDFMGCVL              | P | ELISA                                                       | qualitative binding                                           |
| 25293 | IAGLIAIVMVTILLCCM              | P | ELISA                                                       | qualitative binding                                           |
| 25378 | IAPGQTGVIADYNYKLP              | P | ELISA                                                       | qualitative binding                                           |
| 26610 | IINNSTNVVIRACNFEL              | P | ELISA                                                       | qualitative binding                                           |
| 27357 | ILSRLDKVEAEVQIDRL              | P | ELISA                                                       | qualitative binding                                           |
| 28548 | ISITTEVMPVSMAKTSV              | N | ELISA                                                       | qualitative binding                                           |
| 29108 | ITTDNTFVSGNCDVVIG              | N | ELISA                                                       | qualitative binding                                           |
| 29832 | KAISQIQESLTTTSTAL              | P | ELISA                                                       | qualitative binding                                           |
| 30435 | KEIDRLNEVAKNLNESL              | N | ELISA                                                       | qualitative binding                                           |
| 31581 | KKISNCVADYSVLYNST              | P | ELISA                                                       | qualitative binding                                           |
| 32037 | KLNDLCFVSNVYADSFVV             | P | ELISA                                                       | qualitative binding                                           |
| 32070 | KLPDDFMGCVLAWNTRN              | P | ELISA                                                       | qualitative binding                                           |
| 32508 | KNHTSPDVLGDISGIN               | P | ELISA                                                       | qualitative binding                                           |
| 32912 | KPTTFMLKYDENGTTID              | P | ELISA                                                       | qualitative binding                                           |
| 33032 | KQLSSNFGAISSVNDI               | N | ELISA                                                       | qualitative binding                                           |
| 33358 | KSIVAYTMSLGADSSIA              | P | ELISA                                                       | qualitative binding                                           |
| 33874 | KTSVDCNMYICGDSTEC              | P | ELISA                                                       | qualitative binding                                           |
| 34217 | KVTLADAGFMKQYGECL              | N | ELISA                                                       | qualitative binding                                           |
| 35083 | LCPFGEVFNATKFPSVY              | P | ELISA                                                       | qualitative binding                                           |
| 36167 | LGINITNFRAILTAFSP              | P | ELISA                                                       | qualitative binding                                           |
| 36579 | LIKNQCVNFNFNGLTGT              | P | ELISA                                                       | qualitative binding                                           |
| 36815 | LKCSVKSEIDKGIYQT               | P | ELISA                                                       | qualitative binding                                           |
| 36856 | LKGACSCGSCCKFDEDD              | P | ELISA                                                       | qualitative binding                                           |
| 36991 | LKPIFKLPLGINITNFR              | P | ELISA                                                       | qualitative binding                                           |
| 37758 | LLRSTSQKSIVAYTMSL              | P | ELISA                                                       | qualitative binding                                           |
| 38118 | LMSFPQAAPHGVVFLHV              | P | ELISA                                                       | qualitative binding                                           |
| 39023 | LQYGSFCTQLNRALSGI              | P | ELISA                                                       | qualitative binding                                           |
| 39110 | LRHGKLRPFERDISNVP              | N | ELISA                                                       | qualitative binding                                           |
| 40905 | LYQDVNCTDVSTAIHAD              | P | ELISA                                                       | qualitative binding                                           |
| 41177 | MAYRFNGIGVTQNVLYE              | P | ELISA                                                       | qualitative binding                                           |
| 41504 | MFIFLLFLTSTSGSDLD              | P | ELISA                                                       | qualitative binding                                           |
| 41984 | MLKYDENGTTIDAVDCS              | P | ELISA                                                       | qualitative binding                                           |
| 42999 | MVTILLCCMTSCCCLK               | P | ELISA                                                       | qualitative binding                                           |
| 43145 | NAFNCTFEYISDAFSLD              | P | ELISA                                                       | qualitative binding                                           |
| 43264 | NAPATVCGPKLSTDLIK              | P | ELISA                                                       | qualitative binding                                           |
| 43313 | NASSEVALYQDVNCTD               | P | ELISA                                                       | qualitative binding                                           |
| 43825 | NFELCDNPFFAVSKPMG              | P | ELISA                                                       | qualitative binding                                           |
| 43834 | NFFSPQIITDNTFVSG               | N | ELISA                                                       | qualitative binding                                           |
| 43893 | NFNGLTGTGVLTPSSKR              | P | ELISA                                                       | qualitative binding                                           |
| 43924 | NFSQILPDPLKPTKRSF              | N | ELISA                                                       | qualitative binding                                           |
| 44198 | NIDATSTGNYNKYRYL               | P | ELISA                                                       | qualitative binding                                           |
| 45151 | NNKSQSVIINNSTNVV               | P | ELISA                                                       | qualitative binding                                           |
| 45506 | NPVIPFKDGIYFAATEK              | P | ELISA                                                       | qualitative binding                                           |
| 46240 | NTREVFAQVKQMYKTPT              | N | ELISA                                                       | qualitative binding                                           |
| 46379 | NVFQTQAGCLIGAHEVD              | P | ELISA                                                       | qualitative binding                                           |
| 46522 | NVYADSFVVKGDVVRQI              | P | ELISA                                                       | qualitative binding                                           |
| 46681 | NYNYKYRYLRHGKLRPF              | P | ELISA                                                       | qualitative binding                                           |
| 76972 | P462                           | P | ELISA, biological activity, surface Plasmon resonance (SPR) | qualitative binding, neutralization, dissociation constant KD |
| 47341 | PELDSFKEELDKYFKNH              | N | ELISA                                                       | qualitative binding                                           |
| 47479 | PFAMQMAYRFNGIGVTQ              | P | ELISA                                                       | qualitative binding                                           |
| 47823 | PHGVVFLHVTYVPSQER              | P | ELISA                                                       | qualitative binding                                           |
| 48383 | PLKPTKRSFIEDLLFNK              | P | ELISA                                                       | qualitative binding                                           |
| 48554 | PMGTQHTMIFDNFNC                | P | ELISA                                                       | qualitative binding                                           |
| 49557 | PSVYAWERKKISNCVAD              | P | ELISA                                                       | qualitative binding                                           |
| 49968 | PVSMAKTSVDCNMYICGDS            | P | ELISA                                                       | qualitative binding                                           |
| 50058 | PWYVWLGFIAGLIAIVM              | P | ELISA                                                       | qualitative binding                                           |
| 50311 | QALNTLVKQLSSNFGAI              | P | ELISA                                                       | qualitative binding                                           |
| 50767 | QFGRDVSDFDTSVRDPK              | P | ELISA                                                       | qualitative binding                                           |
| 51043 | QIANQFNKAISQIQESL              | P | ELISA                                                       | qualitative binding                                           |
| 51379 | QLIRAAEIRASANLAAT              | P | ELISA                                                       | qualitative binding                                           |

|       |                                    |   |              |                     |
|-------|------------------------------------|---|--------------|---------------------|
| 51456 | QLNRALSGLIAAEQDRNT                 | P | ELISA        | qualitative binding |
| 53116 | RAILTAFSPAQDIWGTS                  | P | ELISA        | qualitative binding |
| 53202 | RASANLAATKMSECVLG                  | P | ELISA        | qualitative binding |
| 53766 | RFQPFQFGRDVSDFTD                   | P | ELISA        | qualitative binding |
| 54599 | RLITGRLQSLQTYVTQQ                  | P | ELISA        | qualitative binding |
| 54989 | RNFTTAPAICHEGKAYF                  | P | ELISA        | qualitative binding |
| 55149 | RPFERDISNVFSPDGK                   | P | ELISA        | qualitative binding |
| 58001 | SGDVVRFPNITNLCPFG                  | P | ELISA        | qualitative binding |
| 58143 | SGNCDVVIGHNNTVYD                   | P | ELISA        | qualitative binding |
| 59120 | SLGADSSIAYSNNITAI                  | P | ELISA        | qualitative binding |
| 59425 | SLQTYVTQQLIRAAEIR                  | P | ELISA        | qualitative binding |
| 59944 | SNVPFSPDGKPCPPAL                   | P | ELISA        | qualitative binding |
| 59985 | SPAQDIWGTSAAAYFVG                  | P | ELISA        | qualitative binding |
| 60014 | SPDGKPCPPALNCYWP                   | P | ELISA        | qualitative binding |
| 62872 | TAGWTFGAGAALQIPFA                  | P | ELISA        | qualitative binding |
| 62908 | TALGKLDVVNNAQAL                    | P | ELISA        | qualitative binding |
| 63309 | TECANLLQYGSFCTQL                   | P | ELISA        | qualitative binding |
| 64085 | THTMIFDNFNFCTFEYI                  | N | ELISA        | qualitative binding |
| 64477 | TITDAVDCSQNPLAELK                  | N | ELISA        | qualitative binding |
| 64888 | TLKYFGGFNFSQILPDP                  | P | ELISA        | qualitative binding |
| 65110 | TLTSGSDLDRCTFFDDV                  | P | ELISA        | qualitative binding |
| 65479 | TNVVIRACNFELCDNPF                  | P | ELISA        | qualitative binding |
| 65832 | TQDLFLFPYSNVTGFHT                  | P | ELISA        | qualitative binding |
| 66337 | TSNFRVVPDGVVRFPN                   | P | ELISA        | qualitative binding |
| 67220 | TVYDPLQPELDSFKEEL                  | P | ELISA        | qualitative binding |
| 68971 | VIGHNNTVYDPLQPEL                   | P | ELISA        | qualitative binding |
| 69299 | VKQMYKTPTLKYFGGFN                  | P | ELISA        | qualitative binding |
| 69513 | VLGQSKRVDFCGKGYHL                  | N | ELISA        | qualitative binding |
| 69699 | VLPLLTDMMIAAYTAA                   | P | ELISA        | qualitative binding |
| 69760 | VLSFELLNAPATVCGPK                  | P | ELISA        | qualitative binding |
| 69865 | VLYENQKQIANQFNKAI                  | P | ELISA        | qualitative binding |
| 70527 | VQAPNYTQHTSSMRGVY                  | P | ELISA        | qualitative binding |
| 70719 | VRFPNITNLCPFGEVFN                  | P | ELISA        | qualitative binding |
| 71189 | VSVITPGTNASSEVAVL                  | P | ELISA        | qualitative binding |
| 71191 | VSVITPGTNASSEVAVLYQDVNCTDVSTAIHADQ | P | western blot | qualitative binding |
| 71589 | LTPAWRIYSTGNNVFQ                   | P | ELISA        | qualitative binding |
| 71589 | VTYVPSQERNFTTAPAI                  | P | ELISA        | qualitative binding |
| 72205 | VYYPDEIFRSDTLYLTQD                 | P | ELISA        | qualitative binding |
| 72519 | WGTSAAAYFVGYLKPTT                  | P | ELISA        | qualitative binding |
| 73036 | WRIYSTGNNVFQTQAGC                  | P | ELISA        | qualitative binding |
| 74173 | YICGDSTECANLLQYG                   | P | ELISA        | qualitative binding |
| 74367 | YISDAFSLDVSEKSGNF                  | P | ELISA        | qualitative binding |
| 75528 | YQPIDVVRDLPSGFNTL                  | P | ELISA        | qualitative binding |
| 75843 | YSNVTGFHT                          | P | ELISA        | qualitative binding |
| 75920 | YSVLYNSTFFSTFKCYG                  | P | ELISA        | qualitative binding |
| 76446 | YVYKGYQPIDVVRDLPS                  | P | ELISA        | qualitative binding |

P: positive; N: negative;

**Table S3.** Sequence-based features of complete genome of the Wuhan seafood market pneumonia virus isolate Wuhan-Hu-1 (NCBI reference sequence accession No. NC\_045512.2).

| Genome Parts   | Position      | Gene   | Product            | Note                                                             | Product            |
|----------------|---------------|--------|--------------------|------------------------------------------------------------------|--------------------|
| 5' UTR         | 1...265       |        |                    |                                                                  |                    |
| Gene           | 266...21555   | orf1ab |                    |                                                                  |                    |
| CDS            | 266...13468   | orf1ab | orf1ab polyprotein | Ribosomal slippage; pp1ab; translated by -1 ribosomal frameshift | orf1ab polyprotein |
|                | 13468...21555 |        |                    |                                                                  |                    |
| Mature peptide | 266...805     | orf1ab | Leader protein     | nsp1.<br>Produced by both pp1a and pp1ab                         | Leader protein     |
| Mature peptide | 806...2719    | orf1ab | Nsp2               | Produced by both pp1a and pp1ab                                  | Nsp2               |

|                |                                |        |                                         |                                                                                                                                                                                                                                               |                                         |
|----------------|--------------------------------|--------|-----------------------------------------|-----------------------------------------------------------------------------------------------------------------------------------------------------------------------------------------------------------------------------------------------|-----------------------------------------|
| Mature peptide | 2720...8554                    | orf1ab | Nsp3                                    | Former nsp1; conserved domains are: N-terminal acidic (Ac), predicted phosphoesterase, papain-like proteinase, Y-domain, transmembrane domain 1 (TM1), adenosine diphosphate-ribose 1"-phosphatase (ADRP).<br>produced by both pp1a and pp1ab | Nsp3                                    |
| Mature peptide | 8555...10054                   | orf1ab | Nsp4                                    | Contains transmembrane domain 2 (TM2); produced by both pp1a and pp1ab                                                                                                                                                                        | Nsp4                                    |
| Mature peptide | 10055...10972                  | orf1ab | 3C-like proteinase                      | nsp5; main proteinase (Mpro); mediates cleavages downstream of nsp4. 3D structure has been determined.<br>Produced by both pp1a and pp1ab                                                                                                     | 3C-like proteinase                      |
| Mature peptide | 10973...11842                  | Orf1ab | Nsp6                                    | Putative transmembrane domain.<br>Produced by both pp1a and pp1ab.                                                                                                                                                                            | Nsp6                                    |
| Mature peptide | 11843...12091                  | Orf1ab | Nsp7                                    | Produced by both pp1a and pp1ab.                                                                                                                                                                                                              | Nsp7                                    |
| Mature peptide | 12092...12685                  | Orf1ab | Nsp8                                    | Produced by both pp1a and pp1ab.                                                                                                                                                                                                              | Nsp8                                    |
| Mature peptide | 12686...13024                  | Orf1ab | Nsp9                                    | ssRNA-binding protein.<br>Produced by both pp1a and pp1ab                                                                                                                                                                                     | Nsp9                                    |
| Mature peptide | 13025...13441                  | Orf1ab | Nsp10                                   | Formerly known as growth-factor-like protein (GFL).<br>Produced by both pp1a and pp1ab.                                                                                                                                                       | Nsp10                                   |
| Mature peptide | 13442...13468<br>13468...16236 | Orf1ab | RNA-dependent RNA polymerase (RdRp)     | nsp12.<br>Produced by pp1ab only.                                                                                                                                                                                                             | RNA-dependent RNA polymerase (RdRp)     |
| Mature peptide | 16237...18039                  | Orf1ab | Helicase                                | nsp13; zinc-binding domain (ZD), NTPase/helicase domain (HEL), RNA 5'-triphosphatase;<br>Produced by pp1ab only.                                                                                                                              | Helicase                                |
| Mature peptide | 18040...19620                  | Orf1ab | 3'-to-5' exonuclease                    | nsp14.<br>Produced by pp1ab only.                                                                                                                                                                                                             | 3'-to-5' exonuclease                    |
| Mature peptide | 19621...20658                  | Orf1ab | endoRNAse                               | nsp15<br>Produced by pp1ab only.                                                                                                                                                                                                              | endoRNAse                               |
| Mature peptide | 20659...21552                  | Orf1ab | 2'-O-ribose methyltransferase (2'-o-MT) | nsp16<br>Produced by pp1ab only                                                                                                                                                                                                               | 2'-O-ribose methyltransferase (2'-o-MT) |
| CDS            | 266...13483                    | Orf1ab | orf1a polyprotein                       | pp1a                                                                                                                                                                                                                                          | orf1a polyprotein                       |
| Mature peptide | 13442...13480                  | Orf1ab | Nsp11                                   | Produced by pp1a only                                                                                                                                                                                                                         | Nsp11                                   |
| Gene           | 21563...25384                  | S      |                                         |                                                                                                                                                                                                                                               |                                         |
| CDS            | 21563...25384                  | S      | Surface glycoprotein                    | Structural protein; spike protein                                                                                                                                                                                                             | Surface glycoprotein                    |
| Gene           | 25393...26220                  | Orf3a  |                                         |                                                                                                                                                                                                                                               |                                         |

|        |               |       |                             |                                     |                       |
|--------|---------------|-------|-----------------------------|-------------------------------------|-----------------------|
| CDS    | 25393...26220 | Orf3a | Orf3a protein               |                                     | Orf3a protein         |
| Gene   | 26245...26472 | E     |                             |                                     |                       |
| CDS    | 26245...26472 | E     | Envelope protein            | orf4, structural protein; E protein | Envelope protein      |
| Gene   | 26523...27191 | M     |                             |                                     |                       |
| CDS    | 26523...27191 | M     | Membrane glycoprotein       | orf5, structural protein            | Membrane glycoprotein |
| Gene   | 27202...27387 | Orf6  |                             |                                     |                       |
| CDS    | 27202...27387 | Orf6  | Orf6 protein                |                                     | Orf6 protein          |
| Gene   | 27394...27759 | Orf7a |                             |                                     |                       |
| CDS    | 27394...27759 | Orf7a | Orf7a protein               |                                     |                       |
| Gene   | 27756...27887 | Orf7b |                             |                                     |                       |
| CDS    | 27756...27887 | Orf7b | Orf7b protein               |                                     |                       |
| Gene   | 27894...28259 | Orf8  |                             |                                     |                       |
| CDS    | 27894...28259 | Orf8  | Orf8 protein                |                                     |                       |
| Gene   | 28274...29533 | N     |                             |                                     |                       |
| CDS    | 28274...29533 | N     | Nucleocapsid phosphoprotein | orf9; structural protein            |                       |
| Gene   | 29558...29674 | Orf10 |                             |                                     |                       |
| CDS    | 29558...29674 | Orf10 | Hypothetical Orf10 protein  |                                     |                       |
| 3' UTR | 29675...29903 |       |                             |                                     |                       |

**CDS:** coding sequence; **UTR:** untranslated region; **ORF:** open reading frame. **NSP:** non-structural protein.
