# Supplementary material for: A domain-based vaccine construct against SARS-CoV-2, the causative agent of COVID-19 pandemic: development of self-amplifying mRNA and peptide vaccines
Source: PubMed Central journal article supplement — Bioimpacts. 2020 Dec 10;11(1):65–84. doi: 10.34172/bi.2021.11 (PMC7803919; doi:10.34172/bi.2021.11), 2020-12-10
Supplement: bi-11-65-s005.pdf [file bi-11-65-s005.pdf]

## Supplementary file 5

Pourseif et al., *BiolImpacts*, 2021, 11(1), 65-84

doi: 10.34172/bi.2021.11

http://bi.tbzmed.ac.ir/

# A domain-based vaccine construct against SARS-CoV-2, the causative agent of COVID-19 pandemic: development of self-amplifying mRNA and peptide vaccines

Mohammad Mostafa Pourseif<sup>1</sup>, Sepideh Parvizpour<sup>1</sup>, Behzad Jafari<sup>2,1</sup>, Jaber Dehghani<sup>1</sup>, Behrouz Naghili<sup>3</sup>, Yadollah Omid<sup>4\*</sup>

<sup>1</sup> Research Center for Pharmaceutical Nanotechnology, Biomedicine Institute, Tabriz University of Medical Sciences, Tabriz, Iran

<sup>2</sup> Department of Medicinal Chemistry, Faculty of Pharmacy, Urmia University of Medical Sciences, Urmia, Iran

<sup>3</sup> Research Center for Infectious and Tropical Diseases, Tabriz University of Medical Sciences, Tabriz, Iran

<sup>4</sup> Nova Southeastern University, College of Pharmacy, Florida, USA

**Table S7.** Population coverage of all predicted CD8<sup>+</sup> and CD4<sup>+</sup> T-cell epitopes in the most-affected countries by COVID-19.

| Country       | HLA class I               |                          |                   | HLA class II *        |                          |                   |
|---------------|---------------------------|--------------------------|-------------------|-----------------------|--------------------------|-------------------|
|               | Coverage <sup>a</sup> (%) | Average hit <sup>b</sup> | Pc90 <sup>c</sup> | Coverage <sup>a</sup> | Average hit <sup>b</sup> | Pc90 <sup>c</sup> |
| United States | 98.72                     | 10.07                    | 4.7               | 85.99                 | 2.94                     | 0.71              |
| Italy         | 98.95                     | 9.93                     | 4.33              | 84.66                 | 1.49                     | 0.65              |
| Spain         | 86.27                     | 5.86                     | 0.73              | 79.61                 | 2.29                     | 0.49              |
| China         | 93.84                     | 7.88                     | 2.42              | 54.75                 | 1.5                      | 0.22              |
| Germany       | 99.88                     | 10.89                    | 5.77              | 89.89                 | 3.3                      | 0.99              |
| Iran          | 97.08                     | 8.75                     | 3.56              | 63.26                 | 1.6                      | 0.27              |
| France        | 99.65                     | 10.21                    | 5.03              | 87.63                 | 3.04                     | 0.81              |
| England       | 99.88                     | 10.12                    | 5.52              | 92.73                 | 3.42                     | 1.15              |
| Belgium       | 98.85                     | 7.28                     | 3.56              | 78.47                 | 2.05                     | 0.46              |
| Turkey        | 44.8                      | 2.24                     | 0.91              | 73.37                 | 2.08                     | 0.38              |
| Austria       | 99.91                     | 11.26                    | 6.14              | 92.6                  | 3.46                     | 1.15              |
| South Korea   | 97.34                     | 11.09                    | 4.65              | 79.8                  | 2.68                     | 0.49              |
| Portugal      | 98.42                     | 9.46                     | 4.14              | 76.7                  | 2.09                     | 0.43              |
| Brazil        | 94.34                     | 7.51                     | 2.35              | 44.39                 | 0.98                     | 0.18              |
| Australia     | 93.92                     | 7.37                     | 2.23              | 24.23                 | 0.55                     | 0.13              |
| Sweden        | 99.91                     | 11.39                    | 5.7               | 85.13                 | 3.09                     | 0.67              |
| Canada        | NA                        | NA                       | NA                | 17.24                 | 0.49                     | 0.12              |
| Average       | 93.86                     | 8.83                     | 3.86              | 71.2                  | 2.18                     | 0.55              |
| SD            | 13.14                     | 2.34                     | 1.65              | 22.41                 | 0.94                     | 0.32              |

**SD:** standard deviation. <sup>a</sup>, projected population coverage. <sup>b</sup>, Average number of epitope hits / HLA combinations recognized by the population. <sup>c</sup>, Minimum number of epitope hits / HLA combinations recognized by 90% of the

population. NA: not available. \* Four HLA-II allele were not available in population coverage calculation, including, HLA-DRB5\*01:01, HLA-DRB3\*01:01, HLA-DRB4\*01:01, HLA-DRB3\*02:02.

**Table S8.** Population coverage of each of 16 predicted CD8<sup>+</sup> T-cell epitopes in the most-affected countries by COVID-19.

| Country                   | HLA-I (A*02:06, A*23:01, A*24:02, A*32:01, B*35:01, B*51:01, B*53:01)<br>(Epitope: IKWPWYIWLGF)                                       |             |             |
|---------------------------|---------------------------------------------------------------------------------------------------------------------------------------|-------------|-------------|
|                           | Coverage                                                                                                                              | Average hit | pc90        |
| Australia                 | 43.72%                                                                                                                                | 0.47        | 0.18        |
| Austria                   | 43.45%                                                                                                                                | 0.51        | 0.18        |
| Belgium                   | 22.38%                                                                                                                                | 0.23        | 0.13        |
| Brazil                    | 37.09%                                                                                                                                | 0.43        | 0.16        |
| China                     | 39.14%                                                                                                                                | 0.44        | 0.16        |
| England                   | 34.10%                                                                                                                                | 0.39        | 0.15        |
| France                    | 48.35%                                                                                                                                | 0.58        | 0.19        |
| Germany                   | 43.94%                                                                                                                                | 0.52        | 0.18        |
| Iran                      | 57.08%                                                                                                                                | 0.72        | 0.23        |
| Italy                     | 58.19%                                                                                                                                | 0.73        | 0.24        |
| Korea; South              | 62.16%                                                                                                                                | 0.79        | 0.26        |
| Portugal                  | 52.95%                                                                                                                                | 0.66        | 0.21        |
| Spain                     | 29.88%                                                                                                                                | 0.33        | 0.14        |
| Sweden                    | 45.39%                                                                                                                                | 0.52        | 0.18        |
| Turkey                    | 0.00%                                                                                                                                 | 0           | 0.1         |
| United States             | 52.23%                                                                                                                                | 0.65        | 0.21        |
| <b>Average</b>            | <b>41.88</b>                                                                                                                          | <b>0.5</b>  | <b>0.18</b> |
| <b>Standard deviation</b> | <b>14.94</b>                                                                                                                          | <b>0.2</b>  | <b>0.04</b> |
| Country                   | HLA-I (A*02:06, A*23:01, A*24:02, A*26:01, A*33:01, A*68:01, B*08:01, B*15:01, B*35:01, B*53:01, B*58:01)<br>(Epitope: LQIPFAMQMAYRF) |             |             |
|                           | Coverage                                                                                                                              | Average hit | pc90        |
| Australia                 | 53.52%                                                                                                                                | 0.64        | 0.22        |
| Austria                   | 61.79%                                                                                                                                | 0.82        | 0.26        |
| Belgium                   | 44.03%                                                                                                                                | 0.52        | 0.18        |
| Brazil                    | 54.54%                                                                                                                                | 0.69        | 0.22        |
| China                     | 53.27%                                                                                                                                | 0.66        | 0.21        |
| England                   | 57.77%                                                                                                                                | 0.73        | 0.24        |
| France                    | 63.04%                                                                                                                                | 0.85        | 0.27        |
| Germany                   | 63.34%                                                                                                                                | 0.85        | 0.27        |
| Iran                      | 63.97%                                                                                                                                | 0.86        | 0.28        |
| Italy                     | 61.78%                                                                                                                                | 0.82        | 0.26        |
| Korea; South              | 73.84%                                                                                                                                | 1.06        | 0.38        |
| Portugal                  | 58.91%                                                                                                                                | 0.77        | 0.24        |

|                           |                                                                                                |                    |             |
|---------------------------|------------------------------------------------------------------------------------------------|--------------------|-------------|
| Spain                     | 31.60%                                                                                         | 0.35               | 0.15        |
| Sweden                    | 68.95%                                                                                         | 0.96               | 0.32        |
| Turkey                    | 0.00%                                                                                          | 0                  | 0.1         |
| United States             | 64.16%                                                                                         | 0.88               | 0.28        |
| <b>Average</b>            | <b>54.66</b>                                                                                   | <b>0.72</b>        | <b>0.24</b> |
| <b>Standard deviation</b> | <b>17.07</b>                                                                                   | <b>0.25</b>        | <b>0.06</b> |
| <b>Country</b>            | <b>HLA-I (A*02:06, A*02:01, A*23:01, B*44:03, B*40:01, B*44:02)</b>                            |                    |             |
|                           | <b>(Epitope: CEFQFCNDPFL)</b>                                                                  |                    |             |
|                           | <b>Coverage</b>                                                                                | <b>Average hit</b> | <b>pc90</b> |
| Australia                 | 46.66%                                                                                         | 0.55               | 0.19        |
| Austria                   | 63.12%                                                                                         | 0.79               | 0.27        |
| Belgium                   | 63.36%                                                                                         | 0.8                | 0.27        |
| Brazil                    | 47.02%                                                                                         | 0.54               | 0.19        |
| China                     | 33.32%                                                                                         | 0.37               | 0.15        |
| England                   | 70.42%                                                                                         | 0.94               | 0.34        |
| France                    | 57.31%                                                                                         | 0.71               | 0.23        |
| Germany                   | 67.38%                                                                                         | 0.87               | 0.31        |
| Iran                      | 42.76%                                                                                         | 0.46               | 0.17        |
| Italy                     | 50.94%                                                                                         | 0.6                | 0.2         |
| Korea; South              | 55.50%                                                                                         | 0.69               | 0.22        |
| Portugal                  | 62.28%                                                                                         | 0.79               | 0.27        |
| Spain                     | 62.72%                                                                                         | 0.76               | 0.27        |
| Sweden                    | 63.98%                                                                                         | 0.82               | 0.28        |
| Turkey                    | 44.80%                                                                                         | 0.45               | 0.18        |
| United States             | 62.56%                                                                                         | 0.79               | 0.27        |
| <b>Average</b>            | <b>55.88</b>                                                                                   | <b>0.68</b>        | <b>0.24</b> |
| <b>Standard deviation</b> | <b>10.14</b>                                                                                   | <b>0.16</b>        | <b>0.05</b> |
| <b>Country</b>            | <b>HLA-I (A*02:01, A*02:03, A*02:06, A*23:01, A*24:02, A*26:01, A*68:02, B*35:01, B*58:01)</b> |                    |             |
|                           | <b>(Epitope: GVFVSNQTHWFV)</b>                                                                 |                    |             |
|                           | <b>Coverage</b>                                                                                | <b>Average hit</b> | <b>pc90</b> |
| Australia                 | 63.97%                                                                                         | 0.76               | 0.28        |
| Austria                   | 81.62%                                                                                         | 1.12               | 0.54        |
| Belgium                   | 58.14%                                                                                         | 0.63               | 0.24        |
| Brazil                    | 60.81%                                                                                         | 0.74               | 0.26        |
| China                     | 57.78%                                                                                         | 0.71               | 0.24        |
| England                   | 66.85%                                                                                         | 0.79               | 0.3         |
| France                    | 69.73%                                                                                         | 0.9                | 0.33        |
| Germany                   | 72.66%                                                                                         | 0.92               | 0.37        |
| Iran                      | 63.64%                                                                                         | 0.82               | 0.28        |
| Italy                     | 69.14%                                                                                         | 0.94               | 0.32        |
| Korea; South              | 81.76%                                                                                         | 1.18               | 0.55        |
| Portugal                  | 71.48%                                                                                         | 0.92               | 0.35        |
| Spain                     | 58.35%                                                                                         | 0.65               | 0.24        |
| Sweden                    | 73.53%                                                                                         | 0.93               | 0.38        |
| Turkey                    | 44.80%                                                                                         | 0.45               | 0.18        |
| United States             | 76.55%                                                                                         | 1.03               | 0.43        |
| <b>Average</b>            | <b>66.93</b>                                                                                   | <b>0.84</b>        | <b>0.33</b> |

|                           |                                                                              |                    |             |
|---------------------------|------------------------------------------------------------------------------|--------------------|-------------|
| <b>Standard deviation</b> | <b>9.42</b>                                                                  | <b>0.18</b>        | <b>0.1</b>  |
| <b>Country</b>            | <b>HLA-I (B*07:02, B*35:01, B*51:01, B*53:01)</b>                            |                    |             |
|                           | <b>(Epitope: FPNITNLCPF)</b>                                                 |                    |             |
|                           | <b>Coverage</b>                                                              | <b>Average hit</b> | <b>pc90</b> |
| Australia                 | 14.41%                                                                       | 0.15               | 0.12        |
| Austria                   | 44.80%                                                                       | 0.49               | 0.18        |
| Brazil                    | 27.02%                                                                       | 0.28               | 0.14        |
| China                     | 14.40%                                                                       | 0.15               | 0.12        |
| England                   | 41.78%                                                                       | 0.45               | 0.17        |
| France                    | 34.26%                                                                       | 0.37               | 0.15        |
| Germany                   | 45.40%                                                                       | 0.5                | 0.18        |
| Iran                      | 46.42%                                                                       | 0.51               | 0.19        |
| Italy                     | 54.14%                                                                       | 0.61               | 0.22        |
| Korea; South              | 30.38%                                                                       | 0.32               | 0.14        |
| Portugal                  | 35.70%                                                                       | 0.38               | 0.16        |
| Spain                     | 25.63%                                                                       | 0.27               | 0.13        |
| Sweden                    | 45.08%                                                                       | 0.48               | 0.18        |
| United States             | 38.36%                                                                       | 0.42               | 0.16        |
| <b>Average</b>            | <b>35.56</b>                                                                 | <b>0.38</b>        | <b>0.16</b> |
| <b>Standard deviation</b> | <b>11.58</b>                                                                 | <b>0.13</b>        | <b>0.03</b> |
| <b>Country</b>            | <b>HLA-I (A*02:01, A*02:03, A*02:0, A*26:01, A*68:02, B*15:01)</b>           |                    |             |
|                           | <b>(Epitope: GFIAGLIAIVM)</b>                                                |                    |             |
|                           | <b>Coverage</b>                                                              | <b>Average hit</b> | <b>pc90</b> |
| Australia                 | 34.37%                                                                       | 0.36               | 0.15        |
| Austria                   | 70.23%                                                                       | 0.86               | 0.34        |
| Belgium                   | 46.86%                                                                       | 0.47               | 0.19        |
| Brazil                    | 41.29%                                                                       | 0.44               | 0.17        |
| China                     | 42.62%                                                                       | 0.5                | 0.17        |
| England                   | 58.49%                                                                       | 0.66               | 0.24        |
| France                    | 54.15%                                                                       | 0.62               | 0.22        |
| Germany                   | 61.76%                                                                       | 0.72               | 0.26        |
| Iran                      | 46.56%                                                                       | 0.49               | 0.19        |
| Italy                     | 45.43%                                                                       | 0.49               | 0.18        |
| Korea; South              | 60.05%                                                                       | 0.75               | 0.25        |
| Portugal                  | 50.45%                                                                       | 0.55               | 0.2         |
| Spain                     | 51.38%                                                                       | 0.53               | 0.21        |
| Sweden                    | 62.27%                                                                       | 0.77               | 0.27        |
| Turkey                    | 44.80%                                                                       | 0.45               | 0.18        |
| United States             | 54.78%                                                                       | 0.61               | 0.22        |
| <b>Average</b>            | <b>51.59</b>                                                                 | <b>0.58</b>        | <b>0.22</b> |
| <b>Standard deviation</b> | <b>9.07</b>                                                                  | <b>0.14</b>        | <b>0.05</b> |
| <b>Country</b>            | <b>HLA-I (A*30:01, A*68:02, B*08:01, B*15:01, B*35:01, B*57:01, B*58:01)</b> |                    |             |
|                           | <b>(Epitope: EVFNATRFASVYAW)</b>                                             |                    |             |
|                           | <b>Coverage</b>                                                              | <b>Average hit</b> | <b>pc90</b> |
| Australia                 | 23.22%                                                                       | 0.25               | 0.13        |
| Austria                   | 60.56%                                                                       | 0.79               | 0.25        |
| Belgium                   | 28.52%                                                                       | 0.3                | 0.14        |

|                           |                                                                              |                    |             |
|---------------------------|------------------------------------------------------------------------------|--------------------|-------------|
| Brazil                    | 26.30%                                                                       | 0.29               | 0.14        |
| China                     | 29.23%                                                                       | 0.32               | 0.14        |
| England                   | 50.57%                                                                       | 0.57               | 0.2         |
| France                    | 49.59%                                                                       | 0.59               | 0.2         |
| Germany                   | 50.93%                                                                       | 0.59               | 0.2         |
| Iran                      | 41.20%                                                                       | 0.47               | 0.17        |
| Italy                     | 43.89%                                                                       | 0.48               | 0.18        |
| Korea; South              | 42.85%                                                                       | 0.49               | 0.17        |
| Portugal                  | 31.46%                                                                       | 0.34               | 0.15        |
| Spain                     | 33.57%                                                                       | 0.36               | 0.15        |
| Sweden                    | 45.76%                                                                       | 0.5                | 0.18        |
| United States             | 41.55%                                                                       | 0.48               | 0.17        |
| <b>Average</b>            | <b>39.95</b>                                                                 | <b>0.45</b>        | <b>0.17</b> |
| <b>Standard deviation</b> | <b>10.45</b>                                                                 | <b>0.14</b>        | <b>0.03</b> |
| <b>Country</b>            | <b>HLA-I (A*01:01, A*02:06, A*30:02, A*26:01, A*68:01, A*68:02, B*15:01)</b> |                    |             |
|                           | <b>(Epitope: SGWTAGAAAYYV)</b>                                               |                    |             |
|                           | <b>Coverage</b>                                                              | <b>Average hit</b> | <b>pc90</b> |
| Australia                 | 22.70%                                                                       | 0.24               | 0.13        |
| Austria                   | 58.26%                                                                       | 0.7                | 0.24        |
| Belgium                   | 41.17%                                                                       | 0.44               | 0.17        |
| Brazil                    | 40.75%                                                                       | 0.45               | 0.17        |
| China                     | 27.69%                                                                       | 0.3                | 0.14        |
| England                   | 51.83%                                                                       | 0.6                | 0.21        |
| France                    | 50.01%                                                                       | 0.58               | 0.2         |
| Germany                   | 50.49%                                                                       | 0.6                | 0.2         |
| Iran                      | 26.04%                                                                       | 0.28               | 0.14        |
| Italy                     | 44.40%                                                                       | 0.49               | 0.18        |
| Korea; South              | 40.96%                                                                       | 0.47               | 0.17        |
| Portugal                  | 35.73%                                                                       | 0.4                | 0.16        |
| Spain                     | 7.67%                                                                        | 0.08               | 0.11        |
| Sweden                    | 48.14%                                                                       | 0.58               | 0.19        |
| Turkey                    | 0.00%                                                                        | 0                  | 0.1         |
| United States             | 37.92%                                                                       | 0.43               | 0.16        |
| <b>Average</b>            | <b>36.48</b>                                                                 | <b>0.42</b>        | <b>0.17</b> |
| <b>Standard deviation</b> | <b>15.59</b>                                                                 | <b>0.19</b>        | <b>0.04</b> |
| <b>Country</b>            | <b>HLA-I (A*03:01, A*11:01, A*23:01, A*24:02, A*68:01, B*15:01, B*58:01)</b> |                    |             |
|                           | <b>(Epitope: LYNSASFSTFKCY)</b>                                              |                    |             |
|                           | <b>Coverage</b>                                                              | <b>Average hit</b> | <b>pc90</b> |
| Australia                 | 65.67%                                                                       | 0.8                | 0.29        |
| Austria                   | 57.18%                                                                       | 0.69               | 0.23        |
| Belgium                   | 58.66%                                                                       | 0.67               | 0.24        |
| Brazil                    | 53.18%                                                                       | 0.63               | 0.21        |
| China                     | 71.67%                                                                       | 0.94               | 0.35        |
| England                   | 58.57%                                                                       | 0.72               | 0.24        |
| France                    | 60.43%                                                                       | 0.76               | 0.25        |
| Germany                   | 65.45%                                                                       | 0.84               | 0.29        |

|                           |              |             |             |
|---------------------------|--------------|-------------|-------------|
| Iran                      | 51.56%       | 0.6         | 0.21        |
| Italy                     | 53.70%       | 0.65        | 0.22        |
| Korea; South              | 69.41%       | 0.93        | 0.33        |
| Portugal                  | 58.43%       | 0.71        | 0.24        |
| Spain                     | 14.87%       | 0.15        | 0.12        |
| Sweden                    | 82.15%       | 1.17        | 0.56        |
| United States             | 59.48%       | 0.74        | 0.25        |
| <b>Average</b>            | <b>58.69</b> | <b>0.73</b> | <b>0.27</b> |
| <b>Standard deviation</b> | <b>14.05</b> | <b>0.21</b> | <b>0.09</b> |

| Country                   | HLA-I (A*02:01, A*02:03, A*02:06, A*26:01, A*68:02, B*51:01, B*58:01)<br>(Epitope: NFTISVTTEILPV) |             |             |
|---------------------------|---------------------------------------------------------------------------------------------------|-------------|-------------|
|                           | Coverage                                                                                          | Average hit | pc90        |
| Australia                 | 35.16%                                                                                            | 0.38        | 0.15        |
| Austria                   | 70.86%                                                                                            | 0.88        | 0.34        |
| Belgium                   | 46.86%                                                                                            | 0.47        | 0.19        |
| Brazil                    | 46.15%                                                                                            | 0.52        | 0.19        |
| China                     | 42.50%                                                                                            | 0.5         | 0.17        |
| England                   | 57.87%                                                                                            | 0.65        | 0.24        |
| France                    | 57.26%                                                                                            | 0.69        | 0.23        |
| Germany                   | 60.38%                                                                                            | 0.7         | 0.25        |
| Iran                      | 58.71%                                                                                            | 0.73        | 0.24        |
| Italy                     | 61.45%                                                                                            | 0.78        | 0.26        |
| Korea; South              | 63.85%                                                                                            | 0.84        | 0.28        |
| Portugal                  | 57.71%                                                                                            | 0.69        | 0.24        |
| Spain                     | 58.69%                                                                                            | 0.68        | 0.24        |
| Sweden                    | 50.90%                                                                                            | 0.55        | 0.2         |
| Turkey                    | 44.80%                                                                                            | 0.45        | 0.18        |
| United States             | 57.96%                                                                                            | 0.68        | 0.24        |
| <b>Average</b>            | <b>54.44</b>                                                                                      | <b>0.64</b> | <b>0.23</b> |
| <b>Standard deviation</b> | <b>8.9</b>                                                                                        | <b>0.14</b> | <b>0.05</b> |

| Country      | HLA-I (A*02:01, A*02:03, A*02:06, A*03:01, A*11:01, A*23:01, A*24:02, B*08:01, B*15:01)<br>(Epitope: GYLQPRTFLLKY) |             |      |
|--------------|--------------------------------------------------------------------------------------------------------------------|-------------|------|
|              | Coverage                                                                                                           | Average hit | pc90 |
| Australia    | 81.10%                                                                                                             | 1.13        | 0.53 |
| Austria      | 85.58%                                                                                                             | 1.3         | 0.69 |
| Belgium      | 85.61%                                                                                                             | 1.26        | 0.7  |
| Brazil       | 67.28%                                                                                                             | 0.85        | 0.31 |
| China        | 83.20%                                                                                                             | 1.17        | 0.6  |
| England      | 89.22%                                                                                                             | 1.45        | 0.93 |
| France       | 82.21%                                                                                                             | 1.22        | 0.56 |
| Germany      | 89.89%                                                                                                             | 1.45        | 0.99 |
| Iran         | 75.10%                                                                                                             | 1           | 0.4  |
| Italy        | 74.41%                                                                                                             | 0.99        | 0.39 |
| Korea; South | 85.94%                                                                                                             | 1.27        | 0.71 |
| Portugal     | 80.70%                                                                                                             | 1.12        | 0.52 |
| Spain        | 61.83%                                                                                                             | 0.73        | 0.26 |

|                           |              |             |             |
|---------------------------|--------------|-------------|-------------|
| Sweden                    | 95.44%       | 1.68        | 1.14        |
| Turkey                    | 44.80%       | 0.45        | 0.18        |
| United States             | 82.50%       | 1.16        | 0.57        |
| <b>Average</b>            | <b>79.05</b> | <b>1.14</b> | <b>0.59</b> |
| <b>Standard deviation</b> | <b>12.03</b> | <b>0.29</b> | <b>0.26</b> |

| Country                   | HLA-I (A*01:01, A*02:03, A*26:01, A*30:02, A*68:02, B*15:01)<br>(Epitope: YTNSFTRGVYY) |             |             |
|---------------------------|----------------------------------------------------------------------------------------|-------------|-------------|
|                           | Coverage                                                                               | Average hit | pc90        |
| Australia                 | 20.38%                                                                                 | 0.21        | 0.13        |
| Austria                   | 54.61%                                                                                 | 0.65        | 0.22        |
| Belgium                   | 32.10%                                                                                 | 0.33        | 0.15        |
| Brazil                    | 28.10%                                                                                 | 0.3         | 0.14        |
| China                     | 29.95%                                                                                 | 0.33        | 0.14        |
| England                   | 49.46%                                                                                 | 0.56        | 0.2         |
| France                    | 46.98%                                                                                 | 0.54        | 0.19        |
| Germany                   | 45.38%                                                                                 | 0.52        | 0.18        |
| Iran                      | 19.18%                                                                                 | 0.2         | 0.12        |
| Italy                     | 41.57%                                                                                 | 0.45        | 0.17        |
| Korea; South              | 31.30%                                                                                 | 0.35        | 0.15        |
| Portugal                  | 29.27%                                                                                 | 0.32        | 0.14        |
| Spain                     | 4.08%                                                                                  | 0.04        | 0.1         |
| Sweden                    | 42.92%                                                                                 | 0.49        | 0.18        |
| Turkey                    | 0.00%                                                                                  | 0           | 0.1         |
| United States             | 31.80%                                                                                 | 0.35        | 0.15        |
| <b>Average</b>            | <b>31.69</b>                                                                           | <b>0.35</b> | <b>0.15</b> |
| <b>Standard deviation</b> | <b>14.91</b>                                                                           | <b>0.18</b> | <b>0.03</b> |

| Country                   | HLA-I (B*35:01, B*51:01, B*53:01, B*57:01)<br>(Epitope: FLPFNSNVTWF) |             |             |
|---------------------------|----------------------------------------------------------------------|-------------|-------------|
|                           | Coverage                                                             | Average hit | pc90        |
| Australia                 | 6.58%                                                                | 0.07        | 0.11        |
| Austria                   | 28.77%                                                               | 0.3         | 0.14        |
| Belgium                   | 3.96%                                                                | 0.04        | 0.1         |
| Brazil                    | 17.21%                                                               | 0.18        | 0.12        |
| China                     | 13.24%                                                               | 0.14        | 0.12        |
| England                   | 22.73%                                                               | 0.24        | 0.13        |
| France                    | 28.12%                                                               | 0.3         | 0.14        |
| Germany                   | 28.31%                                                               | 0.3         | 0.14        |
| Iran                      | 45.68%                                                               | 0.5         | 0.18        |
| Italy                     | 45.62%                                                               | 0.49        | 0.18        |
| Korea; South              | 25.10%                                                               | 0.26        | 0.13        |
| Portugal                  | 30.65%                                                               | 0.32        | 0.14        |
| Spain                     | 33.69%                                                               | 0.36        | 0.15        |
| Sweden                    | 16.38%                                                               | 0.17        | 0.12        |
| United States             | 30.35%                                                               | 0.32        | 0.14        |
| <b>Average</b>            | <b>25.09</b>                                                         | <b>0.27</b> | <b>0.14</b> |
| <b>Standard deviation</b> | <b>11.79</b>                                                         | <b>0.13</b> | <b>0.02</b> |

| Country | HLA-I (A*23:01, A*24:02, B*44:02, B*44:03)<br>(Epitope: EQYIKWPWYIW) |  |  |
|---------|----------------------------------------------------------------------|--|--|
|---------|----------------------------------------------------------------------|--|--|

|                           | Coverage                                                            | Average hit | pc90        |
|---------------------------|---------------------------------------------------------------------|-------------|-------------|
| Australia                 | 43.52%                                                              | 0.47        | 0.18        |
| Austria                   | 38.28%                                                              | 0.44        | 0.16        |
| Belgium                   | 31.13%                                                              | 0.35        | 0.15        |
| Brazil                    | 30.71%                                                              | 0.34        | 0.14        |
| China                     | 27.18%                                                              | 0.28        | 0.14        |
| England                   | 40.60%                                                              | 0.47        | 0.17        |
| France                    | 41.15%                                                              | 0.48        | 0.17        |
| Germany                   | 38.88%                                                              | 0.45        | 0.16        |
| Iran                      | 13.30%                                                              | 0.14        | 0.12        |
| Italy                     | 29.14%                                                              | 0.32        | 0.14        |
| Korea; South              | 49.35%                                                              | 0.56        | 0.2         |
| Portugal                  | 44.81%                                                              | 0.53        | 0.18        |
| Spain                     | 19.67%                                                              | 0.21        | 0.12        |
| Sweden                    | 41.43%                                                              | 0.46        | 0.17        |
| United States             | 40.96%                                                              | 0.47        | 0.17        |
| <b>Average</b>            | <b>35.34</b>                                                        | <b>0.4</b>  | <b>0.16</b> |
| <b>Standard deviation</b> | <b>9.59</b>                                                         | <b>0.12</b> | <b>0.02</b> |
| <b>Country</b>            | <b>HLA-I (A*30:02, A*23:01, A*24:02, B*58:01, B*35:01, B*15:01)</b> |             |             |
|                           | <b>(Epitope: VYSSANNCTFEY)</b>                                      |             |             |
|                           | Coverage                                                            | Average hit | pc90        |
| Australia                 | 45.42%                                                              | 0.5         | 0.18        |
| Austria                   | 39.78%                                                              | 0.46        | 0.17        |
| Belgium                   | 18.64%                                                              | 0.19        | 0.12        |
| Brazil                    | 35.02%                                                              | 0.4         | 0.15        |
| China                     | 42.60%                                                              | 0.5         | 0.17        |
| England                   | 33.33%                                                              | 0.38        | 0.15        |
| France                    | 43.22%                                                              | 0.51        | 0.18        |
| Germany                   | 43.39%                                                              | 0.51        | 0.18        |
| Iran                      | 33.60%                                                              | 0.38        | 0.15        |
| Italy                     | 47.75%                                                              | 0.57        | 0.19        |
| Korea; South              | 61.81%                                                              | 0.79        | 0.26        |
| Portugal                  | 43.26%                                                              | 0.51        | 0.18        |
| Spain                     | 13.91%                                                              | 0.14        | 0.12        |
| Sweden                    | 56.07%                                                              | 0.69        | 0.23        |
| United States             | 49.63%                                                              | 0.6         | 0.2         |
| <b>Average</b>            | <b>40.5</b>                                                         | <b>0.48</b> | <b>0.18</b> |
| <b>Standard deviation</b> | <b>12.11</b>                                                        | <b>0.16</b> | <b>0.04</b> |
| <b>Country</b>            | <b>HLA-I (A*03:01, A*11:01, A*30:02, A*68:01, B*57:01, B*58:01)</b> |             |             |
|                           | <b>(Epitope: CTLKSFTVEKGIY)</b>                                     |             |             |
|                           | Coverage                                                            | Average hit | pc90        |
| Australia                 | 35.47%                                                              | 0.39        | 0.15        |
| Austria                   | 40.06%                                                              | 0.44        | 0.17        |
| Belgium                   | 51.72%                                                              | 0.59        | 0.21        |
| Brazil                    | 38.96%                                                              | 0.43        | 0.16        |
| China                     | 51.87%                                                              | 0.57        | 0.21        |
| England                   | 46.36%                                                              | 0.53        | 0.19        |
| France                    | 44.48%                                                              | 0.52        | 0.18        |



|                           |              |             |             |
|---------------------------|--------------|-------------|-------------|
| Germany                   | 48.52%       | 0.56        | 0.19        |
| Iran                      | 50.31%       | 0.59        | 0.2         |
| Italy                     | 44.28%       | 0.51        | 0.18        |
| Korea; South              | 33.08%       | 0.36        | 0.15        |
| Portugal                  | 39.27%       | 0.44        | 0.16        |
| Spain                     | 20.34%       | 0.22        | 0.13        |
| Sweden                    | 57.34%       | 0.62        | 0.23        |
| United States             | 39.56%       | 0.45        | 0.17        |
| <b>Average</b>            | <b>42.77</b> | <b>0.48</b> | <b>0.18</b> |
| <b>Standard deviation</b> | <b>8.86</b>  | <b>0.1</b>  | <b>0.03</b> |

<sup>a</sup>, projected population coverage. <sup>b</sup>, Average number of epitope hits / HLA combinations recognized by the population. <sup>c</sup>, Minimum number of epitope hits / HLA combinations recognized by 90% of the population.

**Table S9.** Population coverage analysis for the predicted CD4<sup>+</sup> T-cell epitopes in the most-affected countries by COVID-19.

| Country        | HLA-II (DRB1*01:01)<br>(Epitope: YRVVVLSEFLLHAPATVCGPKKS) |             |             |
|----------------|-----------------------------------------------------------|-------------|-------------|
|                | Coverage                                                  | Average hit | pc90        |
| Australia      | 1.44%                                                     | 0.01        | 0.1         |
| Austria        | 22.74%                                                    | 0.23        | 0.13        |
| Belgium        | 16.46%                                                    | 0.16        | 0.12        |
| Brazil         | 3.92%                                                     | 0.04        | 0.1         |
| Canada         | 2.25%                                                     | 0.02        | 0.1         |
| China          | 2.77%                                                     | 0.03        | 0.1         |
| England        | 16.88%                                                    | 0.17        | 0.12        |
| France         | 15.11%                                                    | 0.15        | 0.12        |
| Germany        | 18.65%                                                    | 0.19        | 0.12        |
| Iran           | 10.23%                                                    | 0.1         | 0.11        |
| Italy          | 1.45%                                                     | 0.01        | 0.1         |
| Korea; South   | 12.54%                                                    | 0.13        | 0.11        |
| Portugal       | 9.09%                                                     | 0.09        | 0.11        |
| Spain          | 10.43%                                                    | 0.1         | 0.11        |
| Sweden         | 16.05%                                                    | 0.16        | 0.12        |
| Turkey         | 8.99%                                                     | 0.09        | 0.11        |
| United States  | 13.62%                                                    | 0.14        | 0.12        |
| <b>Average</b> | <b>10.74</b>                                              | <b>0.11</b> | <b>0.11</b> |

|                           |                                                                                                 |                    |             |
|---------------------------|-------------------------------------------------------------------------------------------------|--------------------|-------------|
| <b>Standard deviation</b> | <b>6.4</b>                                                                                      | <b>0.07</b>        | <b>0.01</b> |
| <b>Country</b>            | <b>HLA-II (DRB1*13:02; DRB3*01:01; DRB3*02:02)</b><br><b>(Epitope: HFPREGVVFVSNQTHWFVTQRNF)</b> |                    |             |
|                           | <b>Coverage</b>                                                                                 | <b>Average hit</b> | <b>pc90</b> |
| Austria                   | 12.02%                                                                                          | 0.12               | 0.11        |
| Belgium                   | 6.88%                                                                                           | 0.07               | 0.11        |
| Brazil                    | 3.54%                                                                                           | 0.04               | 0.1         |
| Canada                    | 1.12%                                                                                           | 0.01               | 0.1         |
| China                     | 3.43%                                                                                           | 0.03               | 0.1         |
| England                   | 6.31%                                                                                           | 0.06               | 0.11        |
| France                    | 9.17%                                                                                           | 0.09               | 0.11        |
| Germany                   | 8.22%                                                                                           | 0.08               | 0.11        |
| Iran                      | 3.61%                                                                                           | 0.04               | 0.1         |
| Italy                     | 0.92%                                                                                           | 0.01               | 0.1         |
| Korea; South              | 17.74%                                                                                          | 0.18               | 0.12        |
| Portugal                  | 6.55%                                                                                           | 0.07               | 0.11        |
| Spain                     | 7.01%                                                                                           | 0.07               | 0.11        |
| Sweden                    | 7.09%                                                                                           | 0.07               | 0.11        |
| Turkey                    | 9.75%                                                                                           | 0.1                | 0.11        |
| United States             | 8.34%                                                                                           | 0.08               | 0.11        |
| <b>Average</b>            | <b>6.98</b>                                                                                     | <b>0.07</b>        | <b>0.11</b> |
| <b>Standard deviation</b> | <b>4.07</b>                                                                                     | <b>0.04</b>        | <b>0.01</b> |
| <b>Country</b>            | <b>HLA-II (DRB1*01:01; DRB1*11:01)</b><br><b>(Epitope: MFVFLVLLPLVSSQCVNLT)</b>                 |                    |             |
|                           | <b>Coverage</b>                                                                                 | <b>Average hit</b> | <b>pc90</b> |
| Australia                 | 1.44%                                                                                           | 0.01               | 0.1         |
| Austria                   | 37.75%                                                                                          | 0.4                | 0.16        |
| Belgium                   | 28.94%                                                                                          | 0.3                | 0.14        |
| Brazil                    | 10.17%                                                                                          | 0.1                | 0.11        |
| Canada                    | 4.47%                                                                                           | 0.04               | 0.1         |
| China                     | 9.39%                                                                                           | 0.09               | 0.11        |
| England                   | 25.04%                                                                                          | 0.26               | 0.13        |
| France                    | 26.03%                                                                                          | 0.27               | 0.14        |
| Germany                   | 31.35%                                                                                          | 0.33               | 0.15        |
| Iran                      | 26.89%                                                                                          | 0.28               | 0.14        |
| Italy                     | 4.86%                                                                                           | 0.05               | 0.11        |
| Korea; South              | 19.76%                                                                                          | 0.2                | 0.12        |
| Portugal                  | 18.33%                                                                                          | 0.19               | 0.12        |
| Spain                     | 20.84%                                                                                          | 0.21               | 0.13        |
| Sweden                    | 30.68%                                                                                          | 0.32               | 0.14        |
| Turkey                    | 27.75%                                                                                          | 0.29               | 0.14        |
| United States             | 23.75%                                                                                          | 0.25               | 0.13        |
| <b>Average</b>            | <b>20.44</b>                                                                                    | <b>0.21</b>        | <b>0.13</b> |
| <b>Standard deviation</b> | <b>10.42</b>                                                                                    | <b>0.11</b>        | <b>0.02</b> |
| <b>Country</b>            | <b>HLA-II (DRB1*09:01; DRB1*01:01)</b><br><b>(Epitope: TITSGWTFGAGAALQIPFAMQ)</b>               |                    |             |
|                           | <b>Coverage</b>                                                                                 | <b>Average hit</b> | <b>pc90</b> |

|                                         |                 |                    |             |
|-----------------------------------------|-----------------|--------------------|-------------|
| Australia                               | 1.44%           | 0.01               | 0.1         |
| Austria                                 | 24.14%          | 0.24               | 0.13        |
| Belgium                                 | 16.46%          | 0.16               | 0.12        |
| Brazil                                  | 10.56%          | 0.11               | 0.11        |
| Canada                                  | 2.25%           | 0.02               | 0.1         |
| China                                   | 17.86%          | 0.18               | 0.12        |
| England                                 | 19.19%          | 0.19               | 0.12        |
| France                                  | 15.68%          | 0.16               | 0.12        |
| Germany                                 | 20.39%          | 0.21               | 0.13        |
| Iran                                    | 10.91%          | 0.11               | 0.11        |
| Italy                                   | 1.81%           | 0.02               | 0.1         |
| Korea; South                            | 29.61%          | 0.31               | 0.14        |
| Portugal                                | 11.86%          | 0.12               | 0.11        |
| Spain                                   | 11.58%          | 0.12               | 0.11        |
| Sweden                                  | 37.10%          | 0.39               | 0.16        |
| Turkey                                  | 8.99%           | 0.09               | 0.11        |
| United States                           | 18.57%          | 0.19               | 0.12        |
| <b>Average</b>                          | <b>15.2</b>     | <b>0.15</b>        | <b>0.12</b> |
| <b>Standard deviation</b>               | <b>9.3</b>      | <b>0.1</b>         | <b>0.02</b> |
| <b>HLA-II (DRB1*03:01; DRB3*01:01)</b>  |                 |                    |             |
| <b>(Epitope: SKHTPINLVRDLPQGFSALEP)</b> |                 |                    |             |
| <b>Country</b>                          | <b>Coverage</b> | <b>Average hit</b> | <b>pc90</b> |
| Australia                               | 6.38%           | 0.06               | 0.11        |
| Austria                                 | 22.21%          | 0.22               | 0.13        |
| Belgium                                 | 28.94%          | 0.29               | 0.14        |
| Brazil                                  | 11.24%          | 0.11               | 0.11        |
| Canada                                  | 4.45%           | 0.04               | 0.1         |
| China                                   | 6.30%           | 0.06               | 0.11        |
| England                                 | 25.32%          | 0.25               | 0.13        |
| France                                  | 23.93%          | 0.24               | 0.13        |
| Germany                                 | 20.52%          | 0.21               | 0.13        |
| Iran                                    | 18.61%          | 0.19               | 0.12        |
| Italy                                   | 59.99%          | 0.6                | 0.25        |
| Korea; South                            | 4.89%           | 0.05               | 0.11        |
| Portugal                                | 19.21%          | 0.19               | 0.12        |
| Spain                                   | 19.21%          | 0.19               | 0.12        |
| Sweden                                  | 14.39%          | 0.14               | 0.12        |
| Turkey                                  | 17.55%          | 0.18               | 0.12        |
| United States                           | 21.82%          | 0.22               | 0.13        |
| <b>Average</b>                          | <b>19.12</b>    | <b>0.19</b>        | <b>0.13</b> |
| <b>Standard deviation</b>               | <b>12.55</b>    | <b>0.13</b>        | <b>0.03</b> |
| <b>HLA-II (DRB1*04:05)</b>              |                 |                    |             |
| <b>(Epitope: FGGFNFSQILPDPSK)</b>       |                 |                    |             |
| <b>Country</b>                          | <b>Coverage</b> | <b>Average hit</b> | <b>pc90</b> |
| Australia                               | 4.94%           | 0.05               | 0.11        |
| Belgium                                 | 2.98%           | 0.03               | 0.1         |

|                           |                                                             |                    |             |
|---------------------------|-------------------------------------------------------------|--------------------|-------------|
| Brazil                    | 1.64%                                                       | 0.02               | 0.1         |
| Canada                    | 1.12%                                                       | 0.01               | 0.1         |
| China                     | 6.15%                                                       | 0.06               | 0.11        |
| England                   | 1.87%                                                       | 0.02               | 0.1         |
| France                    | 2.66%                                                       | 0.03               | 0.1         |
| Germany                   | 0.64%                                                       | 0.01               | 0.1         |
| Iran                      | 1.69%                                                       | 0.02               | 0.1         |
| Italy                     | 24.31%                                                      | 0.24               | 0.13        |
| Korea; South              | 15.74%                                                      | 0.16               | 0.12        |
| Portugal                  | 4.08%                                                       | 0.04               | 0.1         |
| Spain                     | 3.73%                                                       | 0.04               | 0.1         |
| Sweden                    | 0.68%                                                       | 0.01               | 0.1         |
| Turkey                    | 3.57%                                                       | 0.04               | 0.1         |
| United States             | 1.22%                                                       | 0.01               | 0.1         |
| <b>Average</b>            | <b>4.81</b>                                                 | <b>0.05</b>        | <b>0.1</b>  |
| <b>Standard deviation</b> | <b>6.13</b>                                                 | <b>0.06</b>        | <b>0.01</b> |
| <b>Country</b>            | <b>HLA-II (DRB1*04:01)<br/>(Epitope: ALNTLVKQLSSNFGAIS)</b> |                    |             |
|                           | <b>Coverage</b>                                             | <b>Average hit</b> | <b>pc90</b> |
| Australia                 | 0.72%                                                       | 0.01               | 0.1         |
| Austria                   | 13.14%                                                      | 0.13               | 0.12        |
| Belgium                   | 11.83%                                                      | 0.12               | 0.11        |
| Brazil                    | 2.27%                                                       | 0.02               | 0.1         |
| Canada                    | 1.12%                                                       | 0.01               | 0.1         |
| China                     | 1.92%                                                       | 0.02               | 0.1         |
| England                   | 22.67%                                                      | 0.23               | 0.13        |
| France                    | 18.87%                                                      | 0.19               | 0.12        |
| Germany                   | 15.52%                                                      | 0.16               | 0.12        |
| Iran                      | 0.40%                                                       | 0                  | 0.1         |
| Italy                     | 2.44%                                                       | 0.02               | 0.1         |
| Korea; South              | 1.29%                                                       | 0.01               | 0.1         |
| Portugal                  | 5.08%                                                       | 0.05               | 0.11        |
| Spain                     | 4.55%                                                       | 0.05               | 0.1         |
| Sweden                    | 14.73%                                                      | 0.15               | 0.12        |
| Turkey                    | 3.96%                                                       | 0.04               | 0.1         |
| United States             | 15.54%                                                      | 0.16               | 0.12        |
| <b>Average</b>            | <b>8</b>                                                    | <b>0.08</b>        | <b>0.11</b> |
| <b>Standard deviation</b> | <b>7.17</b>                                                 | <b>0.07</b>        | <b>0.01</b> |
| <b>Country</b>            | <b>HLA-II (DRB1*15:01)</b>                                  |                    |             |

| <b>(Epitope: LTDEMIAQYTSALLAGT)</b>    |                 |                    |             |
|----------------------------------------|-----------------|--------------------|-------------|
|                                        | <b>Coverage</b> | <b>Average hit</b> | <b>pc90</b> |
| Australia                              | 6.38%           | 0.06               | 0.11        |
| Austria                                | 23.79%          | 0.24               | 0.13        |
| Brazil                                 | 3.46%           | 0.03               | 0.1         |
| Canada                                 | 5.60%           | 0.06               | 0.11        |
| China                                  | 12.96%          | 0.13               | 0.11        |
| England                                | 27.35%          | 0.27               | 0.14        |
| France                                 | 21.23%          | 0.21               | 0.13        |
| Germany                                | 27.01%          | 0.27               | 0.14        |
| Iran                                   | 8.58%           | 0.09               | 0.11        |
| Italy                                  | 1.41%           | 0.01               | 0.1         |
| Korea; South                           | 14.90%          | 0.15               | 0.12        |
| Portugal                               | 14.16%          | 0.14               | 0.12        |
| Spain                                  | 18.19%          | 0.18               | 0.12        |
| Sweden                                 | 19.87%          | 0.2                | 0.12        |
| Turkey                                 | 12.39%          | 0.12               | 0.11        |
| United States                          | 22.86%          | 0.23               | 0.13        |
| <b>Average</b>                         | <b>15.01</b>    | <b>0.15</b>        | <b>0.12</b> |
| <b>Standard deviation</b>              | <b>8.07</b>     | <b>0.08</b>        | <b>0.01</b> |
| <b>HLA-II (DRB1*04:05; DRB1*15:01)</b> |                 |                    |             |
| <b>(Epitope: VQPTESIVRFPNITNLCPFG)</b> |                 |                    |             |
| <b>Country</b>                         | <b>Coverage</b> | <b>Average hit</b> | <b>pc90</b> |
| Australia                              | 11.16%          | 0.11               | 0.11        |
| Austria                                | 23.79%          | 0.24               | 0.13        |
| Belgium                                | 2.98%           | 0.03               | 0.1         |
| Brazil                                 | 5.06%           | 0.05               | 0.11        |
| Canada                                 | 6.68%           | 0.07               | 0.11        |
| China                                  | 18.69%          | 0.19               | 0.12        |
| England                                | 28.94%          | 0.29               | 0.14        |
| France                                 | 23.59%          | 0.24               | 0.13        |
| Germany                                | 27.55%          | 0.28               | 0.14        |
| Iran                                   | 10.20%          | 0.1                | 0.11        |
| Italy                                  | 25.54%          | 0.26               | 0.13        |
| Korea; South                           | 29.37%          | 0.31               | 0.14        |
| Portugal                               | 17.94%          | 0.18               | 0.12        |
| Spain                                  | 21.55%          | 0.22               | 0.13        |
| Sweden                                 | 20.47%          | 0.21               | 0.13        |
| Turkey                                 | 15.73%          | 0.16               | 0.12        |

|                           |                                          |                    |             |
|---------------------------|------------------------------------------|--------------------|-------------|
| United States             | 23.93%                                   | 0.24               | 0.13        |
| <b>Average</b>            | <b>18.42</b>                             | <b>0.19</b>        | <b>0.12</b> |
| <b>Standard deviation</b> | <b>8.21</b>                              | <b>0.08</b>        | <b>0.01</b> |
| <b>Country</b>            | <b>HLA-II (DRB1*04:01; DRB3*02:02)</b>   |                    |             |
|                           | <b>(Epitope: DLFLPFFSNVTWFHAI)</b>       |                    |             |
|                           | <b>Coverage</b>                          | <b>Average hit</b> | <b>pc90</b> |
| Australia                 | 0.72%                                    | 0.01               | 0.1         |
| Austria                   | 13.14%                                   | 0.13               | 0.12        |
| Belgium                   | 11.83%                                   | 0.12               | 0.11        |
| Brazil                    | 2.27%                                    | 0.02               | 0.1         |
| Canada                    | 1.12%                                    | 0.01               | 0.1         |
| China                     | 1.92%                                    | 0.02               | 0.1         |
| England                   | 22.67%                                   | 0.23               | 0.13        |
| France                    | 18.87%                                   | 0.19               | 0.12        |
| Germany                   | 15.52%                                   | 0.16               | 0.12        |
| Iran                      | 0.40%                                    | 0                  | 0.1         |
| Italy                     | 2.44%                                    | 0.02               | 0.1         |
| Korea; South              | 1.29%                                    | 0.01               | 0.1         |
| Portugal                  | 5.08%                                    | 0.05               | 0.11        |
| Spain                     | 4.55%                                    | 0.05               | 0.1         |
| Sweden                    | 14.73%                                   | 0.15               | 0.12        |
| Turkey                    | 3.96%                                    | 0.04               | 0.1         |
| United States             | 15.54%                                   | 0.16               | 0.12        |
| <b>Average</b>            | <b>8.0</b>                               | <b>0.08</b>        | <b>0.11</b> |
| <b>Standard deviation</b> | <b>7.17</b>                              | <b>0.07</b>        | <b>0.01</b> |
| <b>Country</b>            | <b>HLA-II (DRB1*11:01)</b>               |                    |             |
|                           | <b>(Epitope: KVGGNYNLYRLFRKSNLKPFER)</b> |                    |             |
|                           | <b>Coverage</b>                          | <b>Average hit</b> | <b>pc90</b> |
| Austria                   | 17.19%                                   | 0.17               | 0.12        |
| Belgium                   | 13.70%                                   | 0.14               | 0.12        |
| Brazil                    | 6.37%                                    | 0.06               | 0.11        |
| Canada                    | 2.25%                                    | 0.02               | 0.1         |
| China                     | 6.72%                                    | 0.07               | 0.11        |
| England                   | 8.97%                                    | 0.09               | 0.11        |
| France                    | 11.89%                                   | 0.12               | 0.11        |
| Germany                   | 14.14%                                   | 0.14               | 0.12        |
| Iran                      | 17.63%                                   | 0.18               | 0.12        |
| Italy                     | 3.43%                                    | 0.03               | 0.1         |
| Korea; South              | 7.73%                                    | 0.08               | 0.11        |
| Portugal                  | 9.70%                                    | 0.1                | 0.11        |
| Spain                     | 11.02%                                   | 0.11               | 0.11        |
| Sweden                    | 16.03%                                   | 0.16               | 0.12        |
| Turkey                    | 19.72%                                   | 0.2                | 0.12        |
| United States             | 10.92%                                   | 0.11               | 0.11        |
| <b>Average</b>            | <b>11.09</b>                             | <b>0.11</b>        | <b>0.11</b> |
| <b>Standard deviation</b> | <b>4.95</b>                              | <b>0.05</b>        | <b>0.01</b> |

| Country                   | HLA-II (DRB1*07:01)<br>(Epitope: IAIPNFTISVTTEILPVSMT) |             |             |
|---------------------------|--------------------------------------------------------|-------------|-------------|
|                           | Coverage                                               | Average hit | pc90        |
| Australia                 | 5.68%                                                  | 0.06        | 0.11        |
| Austria                   | 25.00%                                                 | 0.25        | 0.13        |
| Belgium                   | 20.97%                                                 | 0.21        | 0.13        |
| Brazil                    | 10.67%                                                 | 0.11        | 0.11        |
| China                     | 8.26%                                                  | 0.08        | 0.11        |
| England                   | 25.65%                                                 | 0.26        | 0.13        |
| France                    | 19.97%                                                 | 0.2         | 0.12        |
| Germany                   | 22.69%                                                 | 0.23        | 0.13        |
| Iran                      | 14.43%                                                 | 0.14        | 0.12        |
| Italy                     | 11.72%                                                 | 0.12        | 0.11        |
| Korea; South              | 12.82%                                                 | 0.13        | 0.11        |
| Portugal                  | 28.10%                                                 | 0.28        | 0.14        |
| Spain                     | 29.07%                                                 | 0.29        | 0.14        |
| Sweden                    | 5.55%                                                  | 0.06        | 0.11        |
| Turkey                    | 17.19%                                                 | 0.17        | 0.12        |
| United States             | 19.84%                                                 | 0.2         | 0.12        |
| <b>Average</b>            | <b>17.35</b>                                           | <b>0.17</b> | <b>0.12</b> |
| <b>Standard deviation</b> | <b>7.49</b>                                            | <b>0.07</b> | <b>0.01</b> |
| Country                   | HLA-II (DRB1*09:01)<br>(Epitope: KCVNFNENGLTGTGVLTES)  |             |             |
|                           | Coverage                                               | Average hit | pc90        |
| Austria                   | 1.59%                                                  | 0.02        | 0.1         |
| Brazil                    | 6.78%                                                  | 0.07        | 0.11        |
| China                     | 15.31%                                                 | 0.15        | 0.12        |
| England                   | 2.54%                                                  | 0.03        | 0.1         |
| France                    | 0.62%                                                  | 0.01        | 0.1         |
| Germany                   | 1.93%                                                  | 0.02        | 0.1         |
| Iran                      | 0.72%                                                  | 0.01        | 0.1         |
| Italy                     | 0.36%                                                  | 0           | 0.1         |
| Korea; South              | 18.31%                                                 | 0.18        | 0.12        |
| Portugal                  | 2.90%                                                  | 0.03        | 0.1         |
| Spain                     | 1.22%                                                  | 0.01        | 0.1         |
| Sweden                    | 23.12%                                                 | 0.23        | 0.13        |
| United States             | 5.33%                                                  | 0.05        | 0.11        |
| <b>Average</b>            | <b>6.21</b>                                            | <b>0.06</b> | <b>0.11</b> |
| <b>Standard deviation</b> | <b>7.34</b>                                            | <b>0.07</b> | <b>0.01</b> |
| Country                   | HLA-II (DRB1*15:01)<br>(Epitope: ECSNLLLQYGSFCTQLNR)   |             |             |
|                           | Coverage                                               | Average hit | pc90        |
| Australia                 | 6.38%                                                  | 0.06        | 0.11        |

|                                                    |                 |                    |             |
|----------------------------------------------------|-----------------|--------------------|-------------|
| Austria                                            | 23.79%          | 0.24               | 0.13        |
| Brazil                                             | 3.46%           | 0.03               | 0.1         |
| Canada                                             | 5.60%           | 0.06               | 0.11        |
| China                                              | 12.96%          | 0.13               | 0.11        |
| England                                            | 27.35%          | 0.27               | 0.14        |
| France                                             | 21.23%          | 0.21               | 0.13        |
| Germany                                            | 27.01%          | 0.27               | 0.14        |
| Iran                                               | 8.58%           | 0.09               | 0.11        |
| Italy                                              | 1.41%           | 0.01               | 0.1         |
| Korea; South                                       | 14.90%          | 0.15               | 0.12        |
| Portugal                                           | 14.16%          | 0.14               | 0.12        |
| Spain                                              | 18.19%          | 0.18               | 0.12        |
| Sweden                                             | 19.87%          | 0.2                | 0.12        |
| Turkey                                             | 12.39%          | 0.12               | 0.11        |
| United States                                      | 22.86%          | 0.23               | 0.13        |
| <b>Average</b>                                     | <b>15.01</b>    | <b>0.15</b>        | <b>0.12</b> |
| <b>Standard deviation</b>                          | <b>8.07</b>     | <b>0.08</b>        | <b>0.01</b> |
| <b>HLA-II (DRB1*13:02)</b>                         |                 |                    |             |
| <b>(Epitope: GNCDVVIGIVNNTVYDPL)</b>               |                 |                    |             |
| <b>Country</b>                                     | <b>Coverage</b> | <b>Average hit</b> | <b>pc90</b> |
| Austria                                            | 12.02%          | 0.12               | 0.11        |
| Belgium                                            | 6.88%           | 0.07               | 0.11        |
| Brazil                                             | 3.54%           | 0.04               | 0.1         |
| Canada                                             | 1.12%           | 0.01               | 0.1         |
| China                                              | 3.43%           | 0.03               | 0.1         |
| England                                            | 6.31%           | 0.06               | 0.11        |
| France                                             | 9.17%           | 0.09               | 0.11        |
| Germany                                            | 8.22%           | 0.08               | 0.11        |
| Iran                                               | 3.61%           | 0.04               | 0.1         |
| Italy                                              | 0.92%           | 0.01               | 0.1         |
| Korea; South                                       | 17.74%          | 0.18               | 0.12        |
| Portugal                                           | 6.55%           | 0.07               | 0.11        |
| Spain                                              | 7.01%           | 0.07               | 0.11        |
| Sweden                                             | 7.09%           | 0.07               | 0.11        |
| Turkey                                             | 9.75%           | 0.1                | 0.11        |
| United States                                      | 8.34%           | 0.08               | 0.11        |
| <b>Average</b>                                     | <b>6.98</b>     | <b>0.07</b>        | <b>0.11</b> |
| <b>Standard deviation</b>                          | <b>4.07</b>     | <b>0.04</b>        | <b>0.01</b> |
| <b>HLA-II (DRB1*04:01; DRB1*13:02; DRB3*02:02)</b> |                 |                    |             |



| <b>(Epitope: TLDSKTQSLIVNNAATNVVIVKVFCEQF)</b>     |                 |                    |             |
|----------------------------------------------------|-----------------|--------------------|-------------|
|                                                    | <b>Coverage</b> | <b>Average hit</b> | <b>pc90</b> |
| Australia                                          | 0.72%           | 0.01               | 0.1         |
| Austria                                            | 24.31%          | 0.25               | 0.13        |
| Belgium                                            | 18.28%          | 0.19               | 0.12        |
| Brazil                                             | 5.77%           | 0.06               | 0.11        |
| Canada                                             | 2.23%           | 0.02               | 0.1         |
| China                                              | 5.32%           | 0.05               | 0.11        |
| England                                            | 28.21%          | 0.29               | 0.14        |
| France                                             | 27.10%          | 0.28               | 0.14        |
| Germany                                            | 23.06%          | 0.24               | 0.13        |
| Iran                                               | 4.00%           | 0.04               | 0.1         |
| Italy                                              | 3.35%           | 0.03               | 0.1         |
| Korea; South                                       | 18.91%          | 0.19               | 0.12        |
| Portugal                                           | 11.46%          | 0.12               | 0.11        |
| Spain                                              | 11.40%          | 0.12               | 0.11        |
| Sweden                                             | 21.27%          | 0.22               | 0.13        |
| Turkey                                             | 13.51%          | 0.14               | 0.12        |
| United States                                      | 23.19%          | 0.24               | 0.13        |
| <b>Average</b>                                     | <b>14.24</b>    | <b>0.15</b>        | <b>0.12</b> |
| <b>Standard deviation</b>                          | <b>9.16</b>     | <b>0.1</b>         | <b>0.01</b> |
| <b>HLA-II (DRB1*01:01; DRB1*15:01; DRB5*01:01)</b> |                 |                    |             |
| <b>(Epitope: IGINITRFQTLALHRSYLTP)</b>             |                 |                    |             |
|                                                    | <b>Coverage</b> | <b>Average hit</b> | <b>pc90</b> |
| Australia                                          | 7.77%           | 0.08               | 0.11        |
| Austria                                            | 43.45%          | 0.47               | 0.18        |
| Belgium                                            | 16.46%          | 0.16               | 0.12        |
| Brazil                                             | 7.31%           | 0.07               | 0.11        |
| Canada                                             | 7.78%           | 0.08               | 0.11        |
| China                                              | 15.54%          | 0.16               | 0.12        |
| England                                            | 41.62%          | 0.44               | 0.17        |
| France                                             | 34.57%          | 0.36               | 0.15        |
| Germany                                            | 42.80%          | 0.46               | 0.17        |
| Iran                                               | 18.34%          | 0.19               | 0.12        |
| Italy                                              | 2.86%           | 0.03               | 0.1         |
| Korea; South                                       | 26.44%          | 0.27               | 0.14        |
| Portugal                                           | 22.57%          | 0.23               | 0.13        |
| Spain                                              | 27.59%          | 0.29               | 0.14        |
| Sweden                                             | 34.16%          | 0.36               | 0.15        |

|                           |              |             |             |
|---------------------------|--------------|-------------|-------------|
| Turkey                    | 20.79%       | 0.21        | 0.13        |
| United States             | 34.76%       | 0.36        | 0.15        |
| <b>Average</b>            | <b>23.81</b> | <b>0.25</b> | <b>0.14</b> |
| <b>Standard deviation</b> | <b>12.87</b> | <b>0.14</b> | <b>0.02</b> |
